# Supplementary material for: LAMP3 induces apoptosis and autoantigen release in Sjögren’s syndrome patients
Source: PubMed Central journal article supplement (PMC7494869; doi:10.1038/s41598-020-71669-5), 2020-09-16
Supplement: 41598_2020_71669_MOESM1_ESM.pdf [file 41598_2020_71669_MOESM1_ESM.pdf]

### **LAMP3 induces apoptosis and autoantigen release in Sjögren's syndrome patients**

Tsutomu Tanaka<sup>1\*</sup>, Blake M. Warner<sup>1\*</sup>, Toshio Odani<sup>1</sup>, Youngmi Ji<sup>1</sup>, Ying-Qian Mo<sup>1</sup>, Hiroyuki Nakamura<sup>1</sup>, Shyh-Ing Jang<sup>1</sup>, Hongen Yin<sup>1</sup>, Drew G. Michael<sup>1</sup>, Noriyuki Hirata<sup>2</sup>, Futoshi Suizu<sup>2</sup>, Satoko Ishigaki<sup>2</sup>, Fabiola Reis Oliveira<sup>3</sup>, Ana Carolina F. Motta<sup>4</sup>, Alfredo Ribeiro-Silva<sup>5</sup>, Eduardo M. Rocha<sup>6</sup>, Tatsuya Atsumi<sup>7</sup>, Masayuki Noguchi<sup>2</sup>, John A. Chiorini<sup>1+</sup>

1. National Institute of Dental and Craniofacial Research, National Institutes of Health, Bethesda, MD, USA.
2. Division of Cancer Biology, Institute for Genetic Medicine, Hokkaido University, Sapporo, Japan
3. Department of Clinical Medicine, Ribeirão Preto Medical School, University of Sao Paulo, Ribeirao Preto, Brazil
4. Department of Stomatology, Public Health and Forensic Dentistry, School of Dentistry of Ribeirao Preto, University of Sao Paulo, Brazil
5. Department of Pathology and Legal Medicine, Ribeirao Preto Medical School, University of Sao Paulo, Ribeirao Preto, SP, Brazil
6. Department of Ophthalmology, Otorhinolaryngology, Head and Neck Surgery, Ribeirão Preto Medical School, University of Sao Paulo, Ribeirao Preto, Brazil
7. Department of Rheumatology, Endocrinology and Nephrology, Faculty of Medicine and Graduate School of Medicine, Hokkaido University, Sapporo, Japan

\* - these authors contributed equally to this work.

<sup>+</sup>Author to whom correspondence should be addressed

John A. Chiorini

AAV Biology Section

NIH 10 Center Dr.

Bethesda MD 20892

Phone 301-496-4279

Fax 301-402-1228

Email: [jchiorini@dir.nidcr.nih.gov](mailto:jchiorini@dir.nidcr.nih.gov)

## **Supplementary Materials and Methods**

### **Transient transfection**

One  $\mu\text{g}$  of pME18S-LAMP3 plasmid or pME18S-empty plasmid as control was introduced to NS-SV-AC cells by using Amaxa Nucleofector and Amaxa Cell Line Nucleofector Kit L. Forty-eight hours after transfection, cells were used for apoptosis assay.

### **RNA isolation and qRT-PCR analysis**

Total RNA from human subjects was extracted using the RNeasy Mini Kit following the manufacturer's recommended protocol (Qiagen, MD, USA). Extracted RNA was treated with TURBO DNase (ThermoFisher Scientific, MD, USA). The concentration and quality of total RNA was measured using NanoDrop (Thermo Fisher Scientific, MD, USA). For qRT-PCR, total RNA was reverse transcribed into cDNA using the High-Capacity RNA-to-cDNA Kit (Thermo Fisher Scientific, MD, USA); 5 ng of cDNA was used as qPCR template in triplicate. TaqMan Gene Expression Assays: *LAMP3* (Hs01111316\_m1) and *ACTB* (Hs01060665\_g1) were used to measure gene expression (Thermo Fisher Scientific, MD, USA). Relative gene expression was calculated using the  $2^{-\Delta\Delta C_t}$  method (1). Data was analyzed by using GraphPad PRISM 8.0 software and presented as mean  $\pm$  s.e.m. For statistical analysis, *P* values were calculated by using the unpaired, two-tailed Student's *t*-test. *P* values were considered statistically significant if  $P < 0.05$ .

### **qRT-PCR analysis**

Total RNA was isolated from cultured cells using RNeasy Mini kits (QIAGEN, Valencia, CA) according to the manufacturer's instructions. cDNA was synthesized from 1  $\mu\text{g}$  total RNA using Superscript III reverse transcriptase (RT) and oligo (dT) primer (Thermo Fisher Scientific, MD) according to the manufacturer's protocol. Quantitative real-time RT polymerase chain reaction (qRT-PCR) was performed to determine the mRNA expression of *CASP3*

(Hs00234387\_m1; Thermo Fisher Scientific, MD) relative to *ACTB* using the  $\Delta\Delta Ct$  method (1). Fold-change in expression of the indicated genes represents the mean ( $\pm$ SD) of triplicate reactions. PCR cycles were performed on the Quantstudio3 Real-Time PCR System (Life Technologies) with the following cycle conditions: 2 minutes at 50°C, 10 minutes at 95°C, 50 cycles of 15 s at 95°C and 1 minute at 60°C.

### **Western blotting**

Cultured cells were washed in ice-cold PBS, lysed by incubation for 30 minutes on ice in RIPA buffer supplemented with protease inhibitor, phosphatase inhibitor (Thermo Fisher Scientific, MD), and 25 $\mu$ M CQ or 20 $\mu$ M pepA, and cleared by centrifugation at 17,000 g for 25 minutes at 4°C. Supernatants and EVs isolated from culture media were heated for 10 minutes at 97°C in LDS sample buffer, resolved by SDS-PAGE, and electrophoretically transferred to PVDF membranes (Invitrolon<sup>TM</sup> PVDF; Thermo Fisher Scientific, MD). The membranes were incubated with blocking buffer (5% non-fat dried milk or Bovine Serum Albumin (Sigma-Aldrich, St. Louis, MO, USA) in wash buffer (0.1% Tween-20 in TBS)) for 60 minutes at 25°C then incubated overnight with primary antibodies: anti-caspase-3 pAb (9662; Cell Signaling Technology Danvers, MA, USA) and Flotillin-1 mAb (clone:D2V7J; 18634S; Cell Signaling Technology); Anti-LAMP3 pAb (12632-1-AP; Proteintech, Inc., Rosemont, IL, USA), Anti-SSB mAb (clone: mAbcam75927; ab75927; Abcam, Cambridge, MA); Anti-ATF4 mAb (clone: S360A-24; NBP2-42176; Novus Biologicals, Littleton, CO, USA) and anti-XBP1 pAb (NBP1-77681; Novus Biologicals, Littleton, CO); Anti-52kDa Ro/SSA (clone: D-12; sc-25351; Santa Cruz Biotechnology, Dallas, TX, USA); Anti- $\alpha$ -tubulin mAb (clone: DM1A, Sigma-Aldrich, St Louis MO). After washing three times with wash buffer (0.1% Tween-20 in TBS), the membranes were reacted with Mouse IgG HRP-linked whole antibody (GENA931; Sigma-Aldrich, St Louis MO)

or Rabbit IgG HRP-linked whole antibody (GENA934; Sigma-Aldrich, St Louis MO) for 1 hour at 25°C. Signal was visualized using a Super Signal West Pico Chemiluminescent Substrate or Super Signal West Pico PLUS Chemiluminescent Substrate (Thermo Fisher Scientific, MD) according to the manufacturer's protocol.

### **Immunofluorescent labeling and protein expression quantification**

Tissue sections (5µm) were cut from formalin-fixed paraffin embedded (FFPE) minor salivary gland (MSG) biopsy blocks. FFPE sections were deparaffinized, rehydrated, and subjected to citric acid microwave antigen retrieval. Slides were then blocked with 5% donkey serum (Jackson ImmunoResearch, West Grove, PA) and 0.5% BSA (Sigma Aldrich Corp, The Woodlands, TX) in PBS for 1 hour at 25°C in a humidified chamber then incubated at 4°C overnight with 100µl of 10 µg/mL primary antibodies as listed: LAMP3 (12632-1-AP, Proteintech, Rosemont IL). Slides were then washed in 5 changes of PBS for 5 minutes each, then incubated with 1:200 dilution of 2 mg/mL AlexaFluor 488 donkey anti-rabbit IgG (Cat. 711-545-152, Jackson ImmunoResearch, West Grove, PA) secondary antibody for 1 hour at 25°C in the dark, followed by washing in 5 changes of PBS for 5 minutes each, and counterstaining with DAPI mounting medium. All images were acquired by using Olympus Fluoview 1000 software. Analysis and quantification of expression were performed by using Icy v.1.9.10.0 (BioImage Analysis unit Institut Pasteur, Paris, France).

### **Confocal microscopy**

Cultured cells were washed with PBS three times, and then fixed with 4% paraformaldehyde for 10 minutes then washed three times with PBS. Cells were permeabilized with 100% -20°C methanol for 10 minutes and 0.5% saponin in PBS for 10 minutes. Cells were then washed with PBS five times. Cells were incubated with blocking buffer (0.5%

immunoglobulin-free BSA, 0.1% saponin, 2.2% glycine, 0.1% Tween-20 and 5% donkey serum in PBS). Cells were then incubated overnight with antibodies: Anti-52kDa Ro/SSA mAb (Santa Cruz Biotechnology; clone: D-12; sc-25351) or anti-SSB mAb (Abcam; clone: mAbcam75927; ab75927). After washing with PBS five times, cells were incubated with 2 mg/mL AlexaFluor 594 donkey anti-mouse IgG secondary antibody (Cat. 711-585-152; Jackson ImmunoResearch Laboratories, Inc., West Grove, PA, USA) at 25°C. Cells were then washed five times in PBS and then mounted. Areas with cells were imaged using an Olympus confocal microscope with silicone immersion 60X or 100X objective with 22 stacked sections at a z-dimension of 0.50 or 0.30  $\mu\text{m}$  per section, respectively. Image analysis was performed using Icy v.1.9.10.0 applications.

## **Reference**

1. Pfaffl MW. A new mathematical model for relative quantification in real-time RT-PCR. *Nucleic Acids Res.* 2001; 29(9): e45

Supplementary Table S1. Two hundred and seventy-nine common genes with significantly differential expression (all  $p < 0.05$ ) in minor salivary glands among four comparisons from 3 transcriptome studies

| Gene Symbol  | Gene Name                                                            | Comparison #1<br>pSS (n=8) vs HV (n=6)<br>Yin, H., 2013 [1] |                  | Comparison #2<br>pSS (n=10) vs non-SS (n=5)<br>Greenwell-Wild, T., 2011 [2] |                  | Comparison #3<br>pSS (n=3) vs HV (n=3)<br>Tsuboi, H., 2014 [3] |                | Comparison #4<br>pSS (n=3) vs IgG4RD (n=5)<br>Tsuboi, H., 2014 [3] |                | Average of<br>fold change<br>(FC) |
|--------------|----------------------------------------------------------------------|-------------------------------------------------------------|------------------|-----------------------------------------------------------------------------|------------------|----------------------------------------------------------------|----------------|--------------------------------------------------------------------|----------------|-----------------------------------|
|              |                                                                      | FC                                                          | <i>p</i> value   | FC                                                                          | <i>p</i> value   | FC                                                             | <i>p</i> value | FC                                                                 | <i>p</i> value |                                   |
| CXCL11       | chemokine (C-X-C motif) ligand 11                                    | 5.891                                                       | 0.015            | 4.827                                                                       | 0.001            | 4.206                                                          | 0.039          | 4.966                                                              | 0.021          | 4.972                             |
| IFI44L       | interferon-induced protein 44-like                                   | 5.287                                                       | 0.007            | 4.710                                                                       | 0.004            | 5.009                                                          | 0.002          | 3.695                                                              | 0.001          | 4.675                             |
| IFI44        | interferon-induced protein 44                                        | 5.116                                                       | 0.002            | 3.513                                                                       | 0.001            | 5.765                                                          | 0.002          | 2.560                                                              | <0.001         | 4.238                             |
| XAF1         | XIAP associated factor 1                                             | 5.595                                                       | 0.001            | 5.140                                                                       | <0.001           | 3.120                                                          | 0.011          | 2.380                                                              | 0.001          | 4.059                             |
| STAT1        | signal transducer and activator of transcription 1                   | 3.882                                                       | 0.010            | 4.253                                                                       | <0.001           | 4.807                                                          | 0.003          | 3.143                                                              | 0.009          | 4.021                             |
| RSAD2        | radical S-adenosyl methionine domain containing 2                    | 5.618                                                       | 0.001            | 2.868                                                                       | 0.007            | 4.434                                                          | 0.004          | 2.618                                                              | 0.002          | 3.885                             |
| <b>LAMP3</b> | <b>lysosomal-associated membrane protein 3</b>                       | <b>5.177</b>                                                | <b>&lt;0.001</b> | <b>3.785</b>                                                                | <b>&lt;0.001</b> | <b>2.621</b>                                                   | <b>0.023</b>   | <b>3.484</b>                                                       | <b>0.012</b>   | <b>3.767</b>                      |
| RGS1         | regulator of G-protein signaling 1                                   | 4.309                                                       | <0.001           | 3.065                                                                       | 0.003            | 2.635                                                          | 0.038          | 4.496                                                              | 0.006          | 3.626                             |
| EPSTI1       | epithelial stromal interaction 1 (breast)                            | 5.535                                                       | 0.003            | 3.106                                                                       | <0.001           | 2.857                                                          | 0.008          | 2.540                                                              | 0.001          | 3.510                             |
| KIAA0125     | KIAA0125                                                             | 5.185                                                       | <0.001           | 2.715                                                                       | 0.005            | 2.849                                                          | 0.024          | 2.772                                                              | 0.044          | 3.380                             |
| SAMD9L       | sterile alpha motif domain containing 9-like                         | 5.283                                                       | 0.001            | 3.112                                                                       | <0.001           | 2.965                                                          | 0.020          | 2.129                                                              | 0.017          | 3.372                             |
| DDX60        | DEAD (Asp-Glu-Ala-Asp) box polypeptide 60                            | 4.600                                                       | 0.004            | 3.550                                                                       | <0.001           | 3.312                                                          | 0.005          | 1.807                                                              | 0.008          | 3.317                             |
| IFIT3        | interferon-induced protein with tetratricopeptide repeats 3          | 3.682                                                       | 0.024            | 3.801                                                                       | 0.001            | 2.867                                                          | 0.012          | 1.859                                                              | 0.023          | 3.052                             |
| SLAMF7       | SLAM family member 7                                                 | 3.986                                                       | 0.004            | 1.938                                                                       | 0.024            | 2.571                                                          | 0.040          | 3.614                                                              | 0.016          | 3.028                             |
| PKHD1L1      | polycystic kidney and hepatic disease 1 (autosomal recessive)-like 1 | 5.044                                                       | 0.003            | 1.854                                                                       | 0.029            | 2.274                                                          | 0.035          | 2.443                                                              | 0.019          | 2.904                             |
| TLR7         | toll-like receptor 7                                                 | 3.937                                                       | 0.008            | 2.909                                                                       | 0.017            | 2.513                                                          | 0.018          | 1.762                                                              | 0.047          | 2.780                             |
| IFI27        | interferon, alpha-inducible protein 27                               | 4.416                                                       | 0.004            | 2.343                                                                       | 0.015            | 2.260                                                          | 0.009          | 1.904                                                              | 0.027          | 2.731                             |
| MANEA        | mannosidase, endo-alpha                                              | 4.061                                                       | 0.006            | 1.647                                                                       | 0.001            | 3.181                                                          | 0.002          | 1.961                                                              | 0.025          | 2.713                             |
| ZNF638       | zinc finger protein 638                                              | 2.005                                                       | 0.024            | 5.183                                                                       | 0.001            | 2.169                                                          | 0.003          | 1.316                                                              | 0.001          | 2.668                             |
| PARP9        | poly (ADP-ribose) polymerase family member 9                         | 3.583                                                       | 0.003            | 2.984                                                                       | <0.001           | 2.170                                                          | 0.006          | 1.858                                                              | 0.004          | 2.649                             |
| IFIT1        | interferon-induced protein with tetratricopeptide repeats 1          | 3.634                                                       | 0.006            | 2.102                                                                       | 0.025            | 2.326                                                          | 0.006          | 2.133                                                              | 0.002          | 2.549                             |

| Gene Symbol | Gene Name                                                                  | Comparison #1         |                | Comparison #2              |                | Comparison #3         |                | Comparison #4             |                | Average of fold change (FC) |
|-------------|----------------------------------------------------------------------------|-----------------------|----------------|----------------------------|----------------|-----------------------|----------------|---------------------------|----------------|-----------------------------|
|             |                                                                            | pSS (n=8) vs HV (n=6) |                | pSS (n=10) vs non-SS (n=5) |                | pSS (n=3) vs HV (n=3) |                | pSS (n=3) vs IgG4RD (n=5) |                |                             |
|             |                                                                            | FC                    | <i>p</i> value | FC                         | <i>p</i> value | FC                    | <i>p</i> value | FC                        | <i>p</i> value |                             |
| VPS13C      | vacuolar protein sorting 13 homolog C ( <i>S. cerevisiae</i> )             | 2.012                 | 0.022          | 5.191                      | <0.001         | 1.688                 | 0.018          | 1.176                     | 0.030          | 2.516                       |
| HSPA13      | heat shock protein 70kDa family, member 13                                 | 2.933                 | 0.005          | 2.341                      | <0.001         | 2.171                 | 0.002          | 1.943                     | 0.011          | 2.347                       |
| PARP14      | Poly (ADP-ribose) polymerase family member 14                              | 3.871                 | 0.001          | 1.698                      | 0.009          | 2.067                 | 0.017          | 1.533                     | 0.040          | 2.292                       |
| SUB1        | SUB1 homolog, transcriptional regulator                                    | 4.240                 | 0.009          | 1.736                      | <0.001         | 1.562                 | 0.022          | 1.366                     | 0.020          | 2.226                       |
| DDX58       | DEAD (Asp-Glu-Ala-Asp) box polypeptide 58                                  | 3.006                 | 0.007          | 2.480                      | 0.001          | 1.856                 | 0.013          | 1.516                     | 0.038          | 2.215                       |
| RAB30       | RAB30, member RAS oncogene family                                          | 2.096                 | 0.027          | 2.404                      | <0.001         | 2.567                 | 0.023          | 1.791                     | 0.020          | 2.215                       |
| OAS2        | 2'-5'-oligoadenylate synthetase 2                                          | 2.327                 | 0.041          | 1.487                      | 0.044          | 2.114                 | 0.006          | 2.805                     | 0.004          | 2.183                       |
| DTX3L       | deltex 3 like, E3 ubiquitin ligase                                         | 2.595                 | 0.008          | 2.515                      | <0.001         | 2.100                 | 0.008          | 1.439                     | 0.019          | 2.162                       |
| PDK1        | pyruvate dehydrogenase kinase, isozyme 1                                   | 2.764                 | 0.002          | 1.637                      | 0.011          | 2.207                 | 0.025          | 2.022                     | 0.006          | 2.158                       |
| HERC6       | HECT and RLD domain containing E3 ubiquitin protein ligase family member 6 | 2.128                 | 0.035          | 1.917                      | 0.035          | 2.153                 | 0.015          | 2.363                     | <0.001         | 2.140                       |
| IFIT5       | interferon-induced protein with tetratricopeptide repeats 5                | 2.951                 | 0.001          | 1.856                      | 0.001          | 2.269                 | 0.002          | 1.418                     | 0.013          | 2.124                       |
| C12orf4     | chromosome 12 open reading frame 4                                         | 2.973                 | 0.006          | 2.090                      | 0.002          | 1.877                 | 0.003          | 1.522                     | 0.007          | 2.116                       |
| GLCCI1      | glucocorticoid induced 1                                                   | 2.316                 | 0.008          | 1.843                      | 0.003          | 2.481                 | 0.003          | 1.740                     | 0.033          | 2.095                       |
| DENND1B     | DENN/MADD domain containing 1B                                             | 2.456                 | 0.022          | 2.327                      | 0.030          | 2.094                 | 0.003          | 1.487                     | 0.005          | 2.091                       |
| ETV7        | ets variant 7                                                              | 3.241                 | 0.026          | 1.426                      | 0.002          | 1.811                 | 0.043          | 1.879                     | 0.022          | 2.089                       |
| IFIH1       | interferon induced, with helicase C domain 1                               | 2.645                 | 0.010          | 1.822                      | <0.001         | 2.270                 | 0.017          | 1.468                     | 0.007          | 2.052                       |
| UFM1        | ubiquitin-fold modifier 1                                                  | 2.941                 | 0.003          | 2.143                      | 0.006          | 1.625                 | 0.012          | 1.405                     | 0.014          | 2.029                       |
| TLR3        | toll-like receptor 3                                                       | 2.495                 | 0.022          | 1.954                      | 0.017          | 2.277                 | 0.016          | 1.386                     | 0.012          | 2.028                       |
| SMG1        | SMG1 phosphatidylinositol 3-kinase-related kinase                          | 2.072                 | 0.031          | 2.764                      | <0.001         | 1.821                 | 0.021          | 1.362                     | 0.030          | 2.005                       |
| HERC5       | HECT and RLD domain containing E3 ubiquitin protein ligase 5               | 2.151                 | 0.027          | 1.880                      | 0.010          | 2.067                 | 0.011          | 1.920                     | <0.001         | 2.005                       |
| RNF213      | ring finger protein 213                                                    | 1.923                 | 0.044          | 2.761                      | 0.012          | 1.849                 | 0.007          | 1.462                     | 0.046          | 1.999                       |

| Gene Symbol | Gene Name                                                             | Comparison #1                              |                | Comparison #2                                              |                | Comparison #3                                 |                | Comparison #4                                     |                | Average of fold change (FC) |
|-------------|-----------------------------------------------------------------------|--------------------------------------------|----------------|------------------------------------------------------------|----------------|-----------------------------------------------|----------------|---------------------------------------------------|----------------|-----------------------------|
|             |                                                                       | pSS (n=8) vs HV (n=6)<br>Yin, H., 2013 [1] |                | pSS (n=10) vs non-SS (n=5)<br>Greenwell-Wild, T., 2011 [2] |                | pSS (n=3) vs HV (n=3)<br>Tsuboi, H., 2014 [3] |                | pSS (n=3) vs IgG4RD (n=5)<br>Tsuboi, H., 2014 [3] |                |                             |
|             |                                                                       | FC                                         | <i>p</i> value | FC                                                         | <i>p</i> value | FC                                            | <i>p</i> value | FC                                                | <i>p</i> value |                             |
| ATM         | ATM serine/threonine kinase                                           | 2.192                                      | 0.019          | 2.696                                                      | 0.001          | 1.761                                         | 0.014          | 1.288                                             | 0.049          | 1.984                       |
| SLFN5       | schlafen family member 5                                              | 1.665                                      | 0.025          | 2.252                                                      | 0.004          | 2.509                                         | 0.026          | 1.390                                             | 0.015          | 1.954                       |
| SEL1L       | sel-1 suppressor of lin-12-like (C. elegans)                          | 1.830                                      | 0.035          | 1.560                                                      | 0.009          | 2.406                                         | 0.023          | 1.814                                             | 0.011          | 1.902                       |
| ZNF280B     | zinc finger protein 280B                                              | 3.245                                      | 0.029          | 1.545                                                      | 0.003          | 1.430                                         | 0.033          | 1.288                                             | 0.021          | 1.877                       |
| HERC4       | HECT and RLD domain containing E3 ubiquitin protein ligase 4          | 1.854                                      | 0.044          | 2.055                                                      | <0.001         | 2.442                                         | 0.019          | 1.154                                             | 0.037          | 1.876                       |
| SP100       | SP100 nuclear antigen                                                 | 2.024                                      | 0.007          | 2.085                                                      | 0.003          | 1.902                                         | 0.015          | 1.425                                             | 0.026          | 1.859                       |
| C5orf56     | chromosome 5 open reading frame 56                                    | 1.971                                      | 0.011          | 2.292                                                      | 0.001          | 1.641                                         | 0.002          | 1.433                                             | 0.030          | 1.834                       |
| USP38       | ubiquitin specific peptidase 38                                       | 2.590                                      | 0.003          | 1.518                                                      | 0.009          | 1.962                                         | 0.008          | 1.190                                             | 0.040          | 1.815                       |
| BMP6        | bone morphogenetic protein 6                                          | 3.143                                      | 0.005          | -1.208                                                     | 0.030          | 2.327                                         | 0.010          | 2.967                                             | <0.001         | 1.807                       |
| SEC24A      | SEC24 homolog A, COPII coat complex component                         | 1.979                                      | 0.031          | 1.635                                                      | 0.001          | 1.952                                         | 0.003          | 1.649                                             | 0.005          | 1.803                       |
| PPM1K       | protein phosphatase, Mg <sup>2+</sup> /Mn <sup>2+</sup> dependent, 1K | 1.851                                      | 0.036          | 1.837                                                      | 0.009          | 1.872                                         | 0.004          | 1.618                                             | 0.007          | 1.795                       |
| SLC44A1     | solute carrier family 44 (choline transporter), member 1              | 1.776                                      | 0.042          | 1.745                                                      | 0.010          | 1.993                                         | 0.014          | 1.653                                             | 0.022          | 1.792                       |
| LARP1B      | La ribonucleoprotein domain family, member 1B                         | 1.838                                      | 0.036          | 1.407                                                      | 0.022          | 1.942                                         | 0.013          | 1.868                                             | 0.002          | 1.764                       |
| IFNAR1      | interferon (alpha, beta and omega) receptor 1                         | 2.324                                      | 0.017          | 1.461                                                      | 0.001          | 1.742                                         | 0.034          | 1.522                                             | 0.001          | 1.762                       |
| LRIF1       | ligand dependent nuclear receptor interacting factor 1                | 2.472                                      | 0.007          | 1.509                                                      | 0.030          | 1.836                                         | <0.001         | 1.204                                             | 0.035          | 1.755                       |
| ITCH        | itchy E3 ubiquitin protein ligase                                     | 1.712                                      | 0.036          | 1.829                                                      | 0.016          | 2.047                                         | 0.015          | 1.325                                             | 0.044          | 1.728                       |
| XIAP        | X-linked inhibitor of apoptosis, E3 ubiquitin protein ligase          | 2.065                                      | 0.022          | 1.497                                                      | 0.023          | 2.072                                         | 0.030          | 1.243                                             | 0.030          | 1.719                       |
| SLC33A1     | solute carrier family 33 (acetyl-CoA transporter), member 1           | 1.754                                      | 0.031          | 1.534                                                      | 0.027          | 1.881                                         | 0.004          | 1.678                                             | 0.002          | 1.712                       |
| SP140L      | SP140 nuclear body protein-like                                       | 1.865                                      | 0.048          | 1.745                                                      | 0.001          | 1.756                                         | 0.033          | 1.475                                             | 0.040          | 1.710                       |
| HS2ST1      | heparan sulfate 2-O-sulfotransferase 1                                | 1.963                                      | 0.027          | 1.508                                                      | 0.002          | 1.980                                         | 0.001          | 1.370                                             | 0.026          | 1.705                       |
| FBXW7       | F-box and WD repeat domain containing 7, E3 ubiquitin protein ligase  | 2.143                                      | 0.014          | 1.577                                                      | 0.006          | 1.697                                         | 0.014          | 1.395                                             | 0.010          | 1.703                       |



| Gene Symbol | Gene Name                                                              | Comparison #1         |                | Comparison #2              |                | Comparison #3         |                | Comparison #4             |                | Average of fold change (FC) |
|-------------|------------------------------------------------------------------------|-----------------------|----------------|----------------------------|----------------|-----------------------|----------------|---------------------------|----------------|-----------------------------|
|             |                                                                        | pSS (n=8) vs HV (n=6) |                | pSS (n=10) vs non-SS (n=5) |                | pSS (n=3) vs HV (n=3) |                | pSS (n=3) vs IgG4RD (n=5) |                |                             |
|             |                                                                        | FC                    | <i>p</i> value | FC                         | <i>p</i> value | FC                    | <i>p</i> value | FC                        | <i>p</i> value |                             |
| DCUN1D1     | DCN1, defective in cullin neddylation 1, domain containing 1           | 2.186                 | 0.014          | 1.418                      | 0.016          | 1.906                 | 0.013          | 1.297                     | 0.007          | 1.702                       |
| HLA-C       | major histocompatibility complex, class I, C                           | 1.792                 | 0.038          | 1.490                      | 0.018          | 1.686                 | 0.022          | 1.805                     | 0.010          | 1.693                       |
| ORMDL1      | ORMDL sphingolipid biosynthesis regulator 1                            | 1.827                 | 0.026          | 1.575                      | 0.018          | 2.005                 | 0.011          | 1.325                     | 0.003          | 1.683                       |
| PPHLN1      | periphilin 1                                                           | 1.596                 | 0.039          | 1.808                      | 0.007          | 1.880                 | 0.003          | 1.427                     | 0.002          | 1.678                       |
| TFAM        | transcription factor A, mitochondrial                                  | 1.905                 | 0.033          | 1.943                      | <0.001         | 1.652                 | 0.010          | 1.149                     | 0.044          | 1.662                       |
| RORA        | RAR-related orphan receptor A                                          | 1.898                 | 0.034          | 1.753                      | 0.002          | 1.677                 | 0.039          | 1.317                     | 0.031          | 1.661                       |
| SPAG9       | sperm associated antigen 9                                             | 1.781                 | 0.033          | 1.757                      | 0.014          | 1.695                 | 0.046          | 1.396                     | 0.004          | 1.657                       |
| TMEM19      | transmembrane protein 19                                               | 1.919                 | 0.047          | 1.603                      | 0.006          | 1.549                 | 0.040          | 1.499                     | 0.015          | 1.643                       |
| MAN1A2      | mannosidase, alpha, class 1A, member 2                                 | 1.853                 | 0.043          | 1.285                      | 0.044          | 1.952                 | 0.006          | 1.435                     | 0.036          | 1.631                       |
| ZBTB38      | zinc finger and BTB domain containing 38                               | 1.805                 | 0.046          | 1.445                      | 0.006          | 1.952                 | 0.004          | 1.301                     | 0.008          | 1.626                       |
| TIPARP      | TCDD-inducible poly (ADP-ribose) polymerase                            | 2.180                 | 0.012          | 1.514                      | <0.001         | 1.418                 | 0.004          | 1.362                     | 0.005          | 1.618                       |
| RINT1       | RAD50 interactor 1                                                     | 1.938                 | 0.010          | 1.617                      | <0.001         | 1.690                 | 0.006          | 1.215                     | 0.047          | 1.615                       |
| NGLY1       | N-glycanase 1                                                          | 2.023                 | 0.021          | 1.697                      | 0.028          | 1.366                 | 0.038          | 1.334                     | 0.024          | 1.605                       |
| USP48       | ubiquitin specific peptidase 48                                        | 1.918                 | 0.029          | 1.590                      | <0.001         | 1.457                 | 0.018          | 1.400                     | <0.001         | 1.591                       |
| XRCC4       | X-ray repair complementing defective repair in Chinese hamster cells 4 | 2.403                 | 0.025          | 1.368                      | 0.036          | 1.398                 | 0.003          | 1.194                     | 0.022          | 1.591                       |
| SLC25A46    | solute carrier family 25, member 46                                    | 1.794                 | 0.039          | 1.692                      | <0.001         | 1.666                 | 0.024          | 1.200                     | 0.045          | 1.588                       |
| LOC645513   | uncharacterized LOC645513                                              | 1.943                 | 0.021          | 1.600                      | 0.024          | 1.426                 | 0.017          | 1.324                     | 0.020          | 1.573                       |
| IQCB1       | IQ motif containing B1                                                 | 1.780                 | 0.033          | 1.580                      | 0.006          | 1.516                 | 0.015          | 1.369                     | 0.005          | 1.561                       |
| TOR1AIP2    | torsin A interacting protein 2                                         | 1.912                 | 0.034          | 1.514                      | 0.004          | 1.637                 | 0.050          | 1.181                     | 0.032          | 1.561                       |
| SYNRG       | synergins, gamma                                                       | 1.562                 | 0.036          | 1.720                      | <0.001         | 1.530                 | 0.028          | 1.411                     | 0.007          | 1.556                       |
| DDI2        | DNA-damage inducible 1 homolog 2                                       | 1.842                 | 0.042          | 1.415                      | 0.023          | 1.640                 | 0.003          | 1.323                     | 0.039          | 1.555                       |
| PSMA3       | proteasome subunit alpha 3                                             | 1.871                 | 0.042          | 1.392                      | 0.003          | 1.685                 | 0.017          | 1.245                     | 0.020          | 1.548                       |
| MDFIC       | MyoD family inhibitor domain containing                                | 1.858                 | 0.034          | 1.503                      | 0.010          | 1.418                 | 0.013          | 1.396                     | 0.019          | 1.544                       |
| CEP57L1     | centrosomal protein 57kDa-like 1                                       | 2.213                 | 0.028          | 1.213                      | 0.025          | 1.418                 | 0.025          | 1.317                     | 0.004          | 1.540                       |

| Gene Symbol | Gene Name                                                | Comparison #1                              |         | Comparison #2                                              |         | Comparison #3                                 |         | Comparison #4                                     |         | Average of fold change (FC) |
|-------------|----------------------------------------------------------|--------------------------------------------|---------|------------------------------------------------------------|---------|-----------------------------------------------|---------|---------------------------------------------------|---------|-----------------------------|
|             |                                                          | pSS (n=8) vs HV (n=6)<br>Yin, H., 2013 [1] |         | pSS (n=10) vs non-SS (n=5)<br>Greenwell-Wild, T., 2011 [2] |         | pSS (n=3) vs HV (n=3)<br>Tsuboi, H., 2014 [3] |         | pSS (n=3) vs IgG4RD (n=5)<br>Tsuboi, H., 2014 [3] |         |                             |
|             |                                                          | FC                                         | p value | FC                                                         | p value | FC                                            | p value | FC                                                | p value |                             |
| BROX        | BRO1 domain and CAAX motif containing                    | 2.210                                      | 0.019   | 1.216                                                      | 0.039   | 1.487                                         | 0.009   | 1.227                                             | 0.028   | 1.535                       |
| GIN1        | gypsy retrotransposon integrase 1                        | 2.025                                      | 0.035   | 1.483                                                      | 0.019   | 1.349                                         | 0.034   | 1.243                                             | 0.028   | 1.525                       |
| KIAA1033    | KIAA1033                                                 | 3.089                                      | 0.005   | 1.651                                                      | <0.001  | 2.589                                         | 0.006   | -1.260                                            | 0.016   | 1.518                       |
| UBA6        | ubiquitin-like modifier activating enzyme 6              | 2.740                                      | 0.009   | 1.865                                                      | 0.001   | 2.676                                         | 0.032   | -1.240                                            | 0.004   | 1.510                       |
| PNPT1       | polyribonucleotide nucleotidyltransferase 1              | 2.025                                      | 0.016   | 1.238                                                      | 0.042   | 1.477                                         | 0.018   | 1.270                                             | 0.003   | 1.503                       |
| LYRM2       | LYR motif containing 2                                   | 2.018                                      | 0.014   | 1.241                                                      | 0.031   | 1.405                                         | 0.016   | 1.339                                             | 0.002   | 1.501                       |
| NUP50       | nucleoporin 50kDa                                        | 1.850                                      | 0.021   | 1.372                                                      | 0.002   | 1.495                                         | 0.014   | 1.279                                             | 0.028   | 1.499                       |
| TSEN15      | TSEN15 tRNA splicing endonuclease subunit                | 1.959                                      | 0.026   | 1.460                                                      | 0.008   | 1.288                                         | 0.042   | 1.289                                             | 0.026   | 1.499                       |
| LRRFIP1     | leucine rich repeat (in FLII) interacting protein 1      | 2.428                                      | 0.049   | 3.605                                                      | 0.002   | 1.503                                         | 0.025   | -1.579                                            | 0.009   | 1.489                       |
| ELMOD2      | ELMO/CED-12 domain containing 2                          | 1.922                                      | 0.022   | 1.406                                                      | 0.004   | 1.323                                         | 0.041   | 1.304                                             | 0.016   | 1.489                       |
| PPP1R2      | protein phosphatase 1, regulatory (inhibitor) subunit 2  | 1.585                                      | 0.046   | 1.537                                                      | 0.017   | 1.553                                         | 0.003   | 1.196                                             | 0.015   | 1.468                       |
| QKI         | QKI, KH domain containing, RNA binding                   | 2.503                                      | 0.029   | 3.172                                                      | 0.002   | 1.776                                         | 0.036   | -1.583                                            | 0.017   | 1.467                       |
| MBNL1       | muscleblind like splicing regulator 1                    | 2.123                                      | 0.011   | 2.112                                                      | <0.001  | 2.970                                         | 0.014   | -1.398                                            | 0.020   | 1.452                       |
| PSMD12      | proteasome 26S subunit, non-ATPase 12                    | 1.726                                      | 0.048   | 1.344                                                      | 0.009   | 1.396                                         | 0.011   | 1.266                                             | 0.017   | 1.433                       |
| NSUN3       | NOP2/Sun domain family, member 3                         | 1.930                                      | 0.043   | 1.254                                                      | 0.041   | 1.331                                         | 0.037   | 1.206                                             | 0.029   | 1.430                       |
| CLDND1      | claudin domain containing 1                              | 1.788                                      | 0.049   | 1.409                                                      | 0.002   | 1.269                                         | 0.038   | 1.169                                             | 0.020   | 1.409                       |
| REL         | v-rel avian reticuloendotheliosis viral oncogene homolog | 2.094                                      | 0.013   | 2.311                                                      | 0.001   | 2.320                                         | 0.014   | -1.267                                            | 0.039   | 1.364                       |
| DNAJB14     | DnaJ (Hsp40) homolog, subfamily B, member 14             | 2.535                                      | 0.010   | 1.863                                                      | 0.001   | 2.137                                         | 0.002   | -1.239                                            | 0.004   | 1.324                       |
| SMC4        | structural maintenance of chromosomes 4                  | 2.323                                      | 0.018   | 2.207                                                      | <0.001  | 2.013                                         | 0.022   | -1.287                                            | 0.016   | 1.314                       |
| ACAP2       |                                                          | 2.401                                      | 0.009   | 2.115                                                      | <0.001  | 1.814                                         | 0.022   | -1.284                                            | 0.005   | 1.261                       |
| MAN1A1      | mannosidase, alpha, class 1A, member 1                   | 2.460                                      | 0.039   | 1.735                                                      | 0.017   | 2.126                                         | 0.030   | -1.300                                            | 0.013   | 1.256                       |
| SP3         | Sp3 transcription factor                                 | 2.026                                      | 0.027   | 2.421                                                      | 0.008   | 1.760                                         | 0.009   | -1.205                                            | 0.009   | 1.251                       |

| Gene Symbol | Gene Name                                                    | Comparison #1         |                | Comparison #2              |                | Comparison #3         |                | Comparison #4             |                | Average of fold change (FC) |
|-------------|--------------------------------------------------------------|-----------------------|----------------|----------------------------|----------------|-----------------------|----------------|---------------------------|----------------|-----------------------------|
|             |                                                              | pSS (n=8) vs HV (n=6) |                | pSS (n=10) vs non-SS (n=5) |                | pSS (n=3) vs HV (n=3) |                | pSS (n=3) vs IgG4RD (n=5) |                |                             |
|             |                                                              | FC                    | <i>p</i> value | FC                         | <i>p</i> value | FC                    | <i>p</i> value | FC                        | <i>p</i> value |                             |
| RECQL       | RecQ helicase-like                                           | 2.345                 | 0.011          | 2.016                      | 0.001          | 2.030                 | 0.008          | -1.392                    | 0.003          | 1.250                       |
| DCLRE1C     | DNA cross-link repair 1C                                     | 2.208                 | 0.020          | 2.119                      | 0.005          | 1.987                 | 0.050          | -1.344                    | 0.041          | 1.243                       |
| ZEB2        | zinc finger E-box binding homeobox 2                         | 2.828                 | 0.020          | 2.226                      | 0.043          | 2.141                 | 0.029          | -2.233                    | 0.001          | 1.241                       |
| CCDC82      | coiled-coil domain containing 82                             | 2.694                 | 0.009          | 1.742                      | 0.001          | 1.812                 | 0.006          | -1.331                    | 0.003          | 1.229                       |
| IFI16       | interferon, gamma-inducible protein 16                       | 2.939                 | 0.004          | 1.650                      | 0.009          | 1.500                 | 0.011          | -1.218                    | 0.043          | 1.218                       |
| CCDC88A     | coiled-coil domain containing 88A                            | 2.524                 | 0.043          | 1.945                      | 0.018          | 1.913                 | 0.012          | -1.616                    | 0.002          | 1.191                       |
| EPS15       | epidermal growth factor receptor pathway substrate 15        | 2.538                 | 0.005          | 1.844                      | 0.004          | 1.617                 | 0.015          | -1.282                    | 0.009          | 1.179                       |
| IFT80       | intraflagellar transport 80                                  | 1.932                 | 0.045          | 2.124                      | 0.001          | 1.777                 | 0.008          | -1.199                    | 0.029          | 1.158                       |
| PTPN11      | protein tyrosine phosphatase, non-receptor type 11           | 1.960                 | 0.026          | 1.339                      | 0.036          | 2.532                 | 0.009          | -1.209                    | 0.011          | 1.156                       |
| FMR1        | fragile X mental retardation 1                               | 1.973                 | 0.041          | 1.952                      | 0.004          | 1.801                 | 0.013          | -1.209                    | 0.035          | 1.129                       |
| MBTD1       | mbt domain containing 1                                      | 1.756                 | 0.049          | 1.575                      | 0.049          | 2.333                 | 0.021          | -1.195                    | 0.045          | 1.117                       |
| CEP290      | centrosomal protein 290kDa                                   | 2.767                 | 0.035          | 1.557                      | 0.003          | 1.600                 | 0.005          | -1.456                    | 0.015          | 1.117                       |
| MTR         | 5-methyltetrahydrofolate-homocysteine methyltransferase      | 1.969                 | 0.019          | 2.268                      | 0.001          | 1.530                 | 0.032          | -1.334                    | 0.001          | 1.108                       |
| CBX3        | chromobox homolog 3                                          | 1.872                 | 0.042          | 1.916                      | 0.010          | 1.813                 | 0.021          | -1.187                    | 0.029          | 1.103                       |
| NR2C1       | nuclear receptor subfamily 2, group C, member 1              | 1.868                 | 0.010          | 2.349                      | 0.001          | 1.707                 | 0.007          | -1.515                    | 0.008          | 1.102                       |
| BLZF1       | basic leucine zipper nuclear factor 1                        | 2.623                 | 0.025          | 1.434                      | 0.005          | 1.668                 | 0.009          | -1.362                    | 0.049          | 1.091                       |
| LRRC40      | leucine rich repeat containing 40                            | 2.183                 | 0.016          | 1.892                      | 0.003          | 1.616                 | 0.008          | -1.330                    | 0.002          | 1.090                       |
| KIDINS220   | kinase D-interacting substrate 220kDa                        | 1.804                 | 0.037          | 2.237                      | 0.019          | 1.569                 | 0.019          | -1.258                    | 0.033          | 1.088                       |
| NEK1        | NIMA-related kinase 1                                        | 2.227                 | 0.042          | 1.403                      | 0.005          | 1.989                 | 0.005          | -1.291                    | 0.024          | 1.082                       |
| LRR1        | leucine rich repeat protein 1                                | 2.629                 | 0.011          | 1.569                      | 0.002          | -1.276                | 0.024          | 1.379                     | 0.017          | 1.075                       |
| LUC7L3      | LUC7-like 3 pre-mRNA splicing factor                         | 1.812                 | 0.044          | 2.331                      | <0.001         | 1.637                 | 0.037          | -1.484                    | 0.003          | 1.074                       |
| FAM3C       | family with sequence similarity 3, member C                  | 1.739                 | 0.050          | 1.620                      | 0.005          | 2.108                 | 0.008          | -1.183                    | 0.009          | 1.071                       |
| SUGT1       | SGT1 homolog, MIS12 kinetochore complex assembly cochaperone | 1.963                 | 0.030          | 1.737                      | 0.015          | 1.833                 | 0.049          | -1.299                    | 0.003          | 1.058                       |
| IFNGR1      | interferon gamma receptor 1                                  | 1.770                 | 0.037          | 2.316                      | 0.023          | 1.393                 | 0.044          | -1.253                    | 0.021          | 1.057                       |

| Gene Symbol | Gene Name                                                              | Comparison #1         |                | Comparison #2              |                | Comparison #3         |                | Comparison #4             |                | Average of fold change (FC) |
|-------------|------------------------------------------------------------------------|-----------------------|----------------|----------------------------|----------------|-----------------------|----------------|---------------------------|----------------|-----------------------------|
|             |                                                                        | pSS (n=8) vs HV (n=6) |                | pSS (n=10) vs non-SS (n=5) |                | pSS (n=3) vs HV (n=3) |                | pSS (n=3) vs IgG4RD (n=5) |                |                             |
|             |                                                                        | FC                    | <i>p</i> value | FC                         | <i>p</i> value | FC                    | <i>p</i> value | FC                        | <i>p</i> value |                             |
| GTF2H3      | general transcription factor IIIH subunit 3                            | 2.037                 | 0.012          | 1.876                      | 0.004          | 1.734                 | 0.013          | -1.434                    | <0.001         | 1.053                       |
| UBE2W       | ubiquitin-conjugating enzyme E2W (putative)                            | 1.846                 | 0.050          | 1.593                      | 0.009          | 2.011                 | 0.006          | -1.237                    | 0.046          | 1.053                       |
| ACTR2       | ARP2 actin-related protein 2 homolog (yeast)                           | 2.304                 | 0.016          | 1.840                      | 0.002          | 1.500                 | 0.024          | -1.456                    | 0.011          | 1.047                       |
| TNRC6B      | trinucleotide repeat containing 6B                                     | 1.765                 | 0.028          | 1.530                      | 0.025          | 2.074                 | 0.028          | -1.194                    | 0.048          | 1.043                       |
| TANK        | TRAF family member-associated NFKB activator                           | 2.014                 | 0.043          | 1.726                      | 0.033          | 1.711                 | 0.024          | -1.285                    | 0.021          | 1.041                       |
| CTDSPL2     | CTD small phosphatase like 2                                           | 1.982                 | 0.032          | 1.418                      | 0.010          | 1.915                 | 0.009          | -1.168                    | 0.034          | 1.037                       |
| ELK3        | ELK3, ETS-domain protein (SRF accessory protein 2)                     | 1.921                 | 0.021          | 1.896                      | 0.007          | 1.748                 | 0.020          | -1.468                    | 0.024          | 1.024                       |
| RAP2B       | RAP2B, member of RAS oncogene family                                   | 2.172                 | 0.019          | 1.866                      | 0.038          | 1.259                 | 0.041          | -1.203                    | 0.040          | 1.023                       |
| ATXN3       | ataxin 3                                                               | 2.518                 | 0.012          | 1.618                      | 0.004          | 1.405                 | 0.044          | -1.501                    | 0.009          | 1.010                       |
| PARP4       | poly (ADP-ribose) polymerase family member 4                           | 2.027                 | 0.010          | 1.476                      | 0.009          | 1.625                 | 0.022          | -1.157                    | 0.048          | 0.993                       |
| ZNF738      | zinc finger protein 738                                                | 2.037                 | 0.036          | 1.487                      | 0.036          | 1.914                 | 0.001          | -1.526                    | 0.002          | 0.978                       |
| TLR4        | toll-like receptor 4                                                   | 2.387                 | 0.049          | 1.925                      | 0.048          | 1.718                 | 0.018          | -2.269                    | 0.001          | 0.940                       |
| RBPJ        | recombination signal binding protein for immunoglobulin kappa J region | 2.042                 | 0.026          | 1.446                      | 0.003          | 1.545                 | 0.026          | -1.287                    | 0.004          | 0.936                       |
| ZYG11B      | zyg-11 family member B, cell cycle regulator                           | 1.697                 | 0.045          | 1.527                      | 0.013          | 1.691                 | 0.043          | -1.225                    | 0.032          | 0.922                       |
| BNIP2       | BCL2/adenovirus E1B 19kDa interacting protein 2                        | 1.865                 | 0.032          | 1.730                      | 0.008          | 1.419                 | 0.025          | -1.338                    | 0.015          | 0.919                       |
| FAM208A     | family with sequence similarity 208, member A                          | 1.967                 | 0.022          | 1.578                      | 0.010          | 1.497                 | 0.005          | -1.369                    | 0.022          | 0.918                       |
| CAST        | calpastatin                                                            | 2.052                 | 0.018          | 1.296                      | 0.013          | 1.553                 | 0.014          | -1.310                    | 0.002          | 0.898                       |
| LATS2       | large tumor suppressor kinase 2                                        | 1.945                 | 0.031          | 1.498                      | 0.007          | 1.561                 | 0.029          | -1.421                    | 0.011          | 0.896                       |
| PXK         | PX domain containing serine/threonine kinase                           | 1.594                 | 0.028          | 1.612                      | 0.004          | 1.632                 | 0.004          | -1.361                    | 0.047          | 0.869                       |
| AGPAT5      | 1-acylglycerol-3-phosphate O-acyltransferase 5                         | 1.637                 | 0.045          | 1.849                      | <0.001         | 1.342                 | 0.027          | -1.355                    | 0.022          | 0.868                       |
| STXBP3      | syntaxin binding protein 3                                             | 1.881                 | 0.031          | 1.527                      | 0.028          | 1.368                 | 0.046          | -1.325                    | 0.007          | 0.863                       |

| Gene Symbol | Gene Name                                                      | Comparison #1         |                | Comparison #2              |                | Comparison #3         |                | Comparison #4             |                | Average of fold change (FC) |
|-------------|----------------------------------------------------------------|-----------------------|----------------|----------------------------|----------------|-----------------------|----------------|---------------------------|----------------|-----------------------------|
|             |                                                                | pSS (n=8) vs HV (n=6) |                | pSS (n=10) vs non-SS (n=5) |                | pSS (n=3) vs HV (n=3) |                | pSS (n=3) vs IgG4RD (n=5) |                |                             |
|             |                                                                | FC                    | <i>p</i> value | FC                         | <i>p</i> value | FC                    | <i>p</i> value | FC                        | <i>p</i> value |                             |
| ZBTB1       | zinc finger and BTB domain containing 1                        | 1.800                 | 0.049          | 1.574                      | 0.032          | 1.656                 | 0.003          | -1.602                    | 0.005          | 0.857                       |
| G3BP1       | GTPase activating protein (SH3 domain) binding protein 1       | 1.792                 | 0.021          | 1.316                      | 0.028          | 1.459                 | 0.025          | -1.159                    | 0.031          | 0.852                       |
| ATE1        | arginyltransferase 1                                           | 1.741                 | 0.049          | -1.198                     | 0.026          | 1.602                 | 0.030          | 1.261                     | 0.009          | 0.852                       |
| USP1        | ubiquitin specific peptidase 1                                 | 1.877                 | 0.043          | 1.380                      | 0.010          | 1.322                 | 0.032          | -1.219                    | 0.044          | 0.840                       |
| ISCA1       | iron-sulfur cluster assembly 1                                 | 1.624                 | 0.043          | 1.610                      | 0.004          | 1.223                 | 0.036          | -1.182                    | 0.048          | 0.819                       |
| POLR1B      | polymerase (RNA) I polypeptide B                               | 1.608                 | 0.034          | 1.318                      | 0.015          | 1.463                 | 0.004          | -1.291                    | 0.007          | 0.775                       |
| CUX1        | cut-like homeobox 1                                            | -1.933                | 0.024          | 1.809                      | 0.003          | 1.375                 | 0.008          | 1.222                     | 0.009          | 0.618                       |
| WISP1       | WNT1 inducible signaling pathway protein 1                     | 3.791                 | 0.025          | -1.269                     | 0.006          | -1.507                | 0.013          | 1.179                     | 0.031          | 0.549                       |
| NUCKS1      | nuclear casein kinase and cyclin-dependent kinase substrate 1  | 1.812                 | 0.013          | -1.383                     | 0.001          | 2.818                 | 0.023          | -1.768                    | 0.022          | 0.370                       |
| CASP8       | caspase 8, apoptosis-related cysteine peptidase                | 1.877                 | 0.048          | 2.189                      | 0.016          | -1.356                | 0.033          | -1.268                    | 0.031          | 0.360                       |
| MAST4       | microtubule associated serine/threonine kinase family member 4 | -2.235                | 0.015          | -1.277                     | 0.009          | 2.005                 | 0.029          | 2.181                     | 0.010          | 0.168                       |
| VASH2       | vasohibin 2                                                    | 4.703                 | 0.011          | -1.397                     | 0.009          | -1.304                | 0.020          | -1.475                    | 0.010          | 0.132                       |
| CYP2U1      | cytochrome P450, family 2, subfamily U, polypeptide 1          | 1.734                 | 0.026          | 1.521                      | 0.050          | -1.267                | 0.033          | -1.740                    | 0.001          | 0.062                       |
| GM2A        | GM2 ganglioside activator                                      | -1.826                | 0.040          | 2.180                      | 0.017          | -1.387                | 0.019          | 1.204                     | 0.040          | 0.043                       |
| LUZP1       | leucine zipper protein 1                                       | -1.804                | 0.025          | 1.576                      | 0.027          | 1.454                 | 0.032          | -1.319                    | 0.031          | -0.023                      |
| HNRNPC      | heterogeneous nuclear ribonucleoprotein C (C1/C2)              | -1.737                | 0.026          | 1.300                      | 0.008          | 1.381                 | 0.049          | -1.260                    | 0.004          | -0.079                      |
| SNRPN       | small nuclear ribonucleoprotein polypeptide N                  | -2.244                | 0.042          | 1.929                      | 0.019          | 1.241                 | 0.038          | -1.293                    | 0.008          | -0.092                      |
| FAM71E2     | family with sequence similarity 71, member E2                  | 3.443                 | 0.042          | -1.307                     | 0.001          | -1.341                | 0.014          | -1.195                    | 0.036          | -0.100                      |
| CNPY3       | canopy FGF signaling regulator 3                               | -1.747                | 0.016          | 1.449                      | 0.011          | -1.417                | 0.013          | 1.181                     | 0.010          | -0.134                      |
| CDC42EP1    | CDC42 small effector 1                                         | -2.567                | 0.004          | -1.251                     | 0.029          | 1.748                 | 0.013          | 1.271                     | 0.028          | -0.200                      |
| ALAD        | aminolevulinatase dehydratase                                  | -2.248                | 0.014          | -1.463                     | 0.003          | 1.591                 | 0.049          | 1.299                     | 0.011          | -0.205                      |
| CALD1       | caldesmon 1                                                    | -3.070                | 0.004          | 1.592                      | 0.013          | 2.299                 | 0.040          | -1.853                    | 0.001          | -0.258                      |

| Gene Symbol | Gene Name                                           | Comparison #1         |                | Comparison #2              |                | Comparison #3         |                | Comparison #4             |                | Average of fold change (FC) |
|-------------|-----------------------------------------------------|-----------------------|----------------|----------------------------|----------------|-----------------------|----------------|---------------------------|----------------|-----------------------------|
|             |                                                     | pSS (n=8) vs HV (n=6) |                | pSS (n=10) vs non-SS (n=5) |                | pSS (n=3) vs HV (n=3) |                | pSS (n=3) vs IgG4RD (n=5) |                |                             |
|             |                                                     | FC                    | <i>p</i> value | FC                         | <i>p</i> value | FC                    | <i>p</i> value | FC                        | <i>p</i> value |                             |
| RTKN        | rhotekin                                            | -2.017                | 0.030          | -1.835                     | 0.011          | 1.397                 | 0.012          | 1.321                     | 0.018          | -0.284                      |
| AP2B1       | adaptor-related protein complex 2, beta 1 subunit   | -2.527                | 0.003          | -2.051                     | 0.001          | 1.601                 | 0.018          | 1.230                     | 0.019          | -0.437                      |
| CDK19       | cyclin-dependent kinase 19                          | 1.913                 | 0.007          | -1.208                     | 0.002          | -1.455                | 0.004          | -1.214                    | 0.034          | -0.491                      |
| PHLDA1      | pleckstrin homology-like domain, family A, member 1 | -3.529                | 0.009          | -1.807                     | 0.025          | 1.724                 | 0.026          | 1.460                     | 0.001          | -0.538                      |
| SYNJ2       | synaptojanin 2                                      | -1.962                | 0.013          | -1.191                     | 0.013          | 1.800                 | 0.012          | -1.241                    | 0.033          | -0.648                      |
| CCNY        | cyclin Y                                            | -1.875                | 0.041          | 1.486                      | 0.002          | -1.291                | 0.014          | -1.212                    | 0.035          | -0.723                      |
| WWTR1       | WW domain containing transcription regulator 1      | -1.943                | 0.035          | -1.367                     | 0.002          | 1.647                 | 0.026          | -1.323                    | 0.013          | -0.747                      |
| DCAF11      | DDB1 and CUL4 associated factor 11                  | -1.611                | 0.046          | -1.545                     | 0.013          | -1.264                | 0.016          | 1.409                     | <0.001         | -0.753                      |
| SLC38A10    | solute carrier family 38, member 10                 | -1.657                | 0.040          | -1.727                     | 0.003          | -1.338                | 0.011          | 1.574                     | 0.001          | -0.787                      |
| BAD         | BCL2-associated agonist of cell death               | -1.705                | 0.028          | -1.572                     | 0.046          | -1.341                | 0.013          | 1.229                     | 0.032          | -0.847                      |
| PXMP2       | peroxisomal membrane protein 2                      | -1.903                | 0.029          | -1.392                     | 0.050          | -1.419                | 0.038          | 1.317                     | 0.008          | -0.849                      |
| SARS2       | seryl-tRNA synthetase 2, mitochondrial              | -1.772                | 0.037          | -1.507                     | 0.001          | -1.295                | 0.017          | 1.171                     | 0.028          | -0.851                      |
| ADCK5       | aarF domain containing kinase 5                     | -1.809                | 0.041          | -1.433                     | 0.007          | -1.378                | 0.048          | 1.211                     | 0.042          | -0.852                      |
| POFUT2      | protein O-fucosyltransferase 2                      | -2.242                | 0.047          | -1.147                     | 0.018          | -1.271                | 0.039          | 1.238                     | 0.049          | -0.856                      |
| RASAL1      | RAS protein activator like 1 (GAP1 like)            | -1.961                | 0.031          | -1.332                     | 0.021          | -1.486                | 0.009          | 1.304                     | 0.038          | -0.869                      |
| SDHAF1      | succinate dehydrogenase complex assembly factor 1   | -1.959                | 0.014          | -1.289                     | 0.043          | -1.477                | 0.009          | 1.214                     | 0.008          | -0.878                      |
| SPPL2B      | signal peptide peptidase like 2B                    | -1.948                | 0.030          | -1.444                     | 0.001          | -1.435                | 0.009          | 1.259                     | 0.010          | -0.892                      |
| MPST        | mercaptopyruvate sulfurtransferase                  | -1.801                | 0.030          | -1.635                     | 0.012          | -1.390                | 0.033          | 1.220                     | 0.024          | -0.901                      |
| KLC1        | kinesin light chain 1                               | -1.985                | 0.013          | -1.714                     | 0.027          | -1.250                | 0.039          | 1.319                     | 0.005          | -0.907                      |
| NCAPH2      | non-SMC condensin II complex subunit H2             | -1.882                | 0.036          | -1.778                     | 0.001          | -1.281                | 0.033          | 1.298                     | 0.002          | -0.911                      |
| ZER1        | zyg-11 related, cell cycle regulator                | -1.810                | 0.025          | -1.602                     | 0.001          | -1.754                | 0.047          | 1.401                     | 0.001          | -0.941                      |
| TRAPPC2L    | trafficking protein particle complex 2-like         | -2.248                | 0.017          | -1.285                     | 0.007          | -1.524                | 0.008          | 1.193                     | 0.038          | -0.966                      |
| ZNF219      | zinc finger protein 219                             | -2.518                | 0.006          | -1.309                     | 0.027          | -1.368                | 0.004          | 1.253                     | 0.047          | -0.986                      |

| Gene Symbol | Gene Name                                                                                           | Comparison #1         |                | Comparison #2              |                | Comparison #3         |                | Comparison #4             |                | Average of fold change (FC) |
|-------------|-----------------------------------------------------------------------------------------------------|-----------------------|----------------|----------------------------|----------------|-----------------------|----------------|---------------------------|----------------|-----------------------------|
|             |                                                                                                     | pSS (n=8) vs HV (n=6) |                | pSS (n=10) vs non-SS (n=5) |                | pSS (n=3) vs HV (n=3) |                | pSS (n=3) vs IgG4RD (n=5) |                |                             |
|             |                                                                                                     | FC                    | <i>p</i> value | FC                         | <i>p</i> value | FC                    | <i>p</i> value | FC                        | <i>p</i> value |                             |
| CLPTM1      | cleft lip and palate associated transmembrane protein 1                                             | -2.294                | 0.030          | -1.567                     | 0.024          | -1.343                | 0.014          | 1.224                     | 0.022          | -0.995                      |
| TMEM8A      | transmembrane protein 8A                                                                            | -1.756                | 0.050          | -2.195                     | 0.002          | -1.319                | 0.019          | 1.283                     | 0.004          | -0.997                      |
| SCRN2       | secernin 2                                                                                          | -2.187                | 0.020          | -1.572                     | 0.001          | -1.428                | 0.029          | 1.182                     | 0.020          | -1.001                      |
| STUB1       | STIP1 homology and U-box containing protein 1, E3 ubiquitin protein ligase                          | -2.093                | 0.015          | -1.796                     | 0.006          | -1.325                | 0.029          | 1.193                     | 0.023          | -1.005                      |
| GHDC        | GH3 domain containing                                                                               | -2.027                | 0.023          | -2.022                     | 0.003          | -1.290                | 0.031          | 1.306                     | 0.023          | -1.008                      |
| FBXL15      | F-box and leucine-rich repeat protein 15                                                            | -1.639                | 0.039          | -1.930                     | 0.005          | -1.657                | 0.005          | 1.192                     | 0.034          | -1.009                      |
| NEDD4L      | neural precursor cell expressed, developmentally down-regulated 4-like, E3 ubiquitin protein ligase | -1.787                | 0.047          | -2.203                     | 0.002          | 1.365                 | 0.013          | -1.424                    | 0.025          | -1.012                      |
| PGLS        | 6-phosphogluconolactonase                                                                           | -1.838                | 0.021          | -1.988                     | 0.024          | -1.441                | 0.024          | 1.197                     | 0.026          | -1.017                      |
| CDH23       | cadherin-related 23                                                                                 | -2.633                | 0.023          | -1.266                     | 0.024          | -1.420                | 0.008          | 1.244                     | 0.017          | -1.019                      |
| GPS1        | G protein pathway suppressor 1                                                                      | -2.141                | 0.007          | -1.889                     | 0.007          | -1.307                | 0.038          | 1.255                     | 0.020          | -1.021                      |
| TMEM132A    | transmembrane protein 132A                                                                          | -2.499                | 0.033          | -1.318                     | 0.009          | -1.452                | 0.024          | 1.160                     | 0.041          | -1.027                      |
| TBC1D16     | TBC1 domain family, member 16                                                                       | -2.426                | 0.038          | -1.765                     | 0.001          | -1.244                | 0.044          | 1.301                     | 0.033          | -1.033                      |
| SCAND1      | SCAN domain containing 1                                                                            | -2.094                | 0.042          | -1.911                     | 0.004          | -1.318                | 0.043          | 1.164                     | 0.048          | -1.040                      |
| HM13        | histocompatibility (minor) 13                                                                       | -1.731                | 0.035          | -2.359                     | 0.007          | -1.316                | 0.045          | 1.234                     | 0.025          | -1.043                      |
| AUP1        | ancient ubiquitous protein 1                                                                        | -2.214                | 0.023          | -1.699                     | 0.006          | -1.456                | 0.007          | 1.162                     | 0.025          | -1.052                      |
| SGSM3       | small G protein signaling modulator 3                                                               | -2.321                | 0.036          | -2.023                     | 0.004          | -1.238                | 0.046          | 1.374                     | 0.015          | -1.052                      |
| LMF1        | lipase maturation factor 1                                                                          | -1.877                | 0.034          | -2.485                     | 0.001          | -1.342                | 0.025          | 1.463                     | 0.003          | -1.060                      |
| SLC25A29    | solute carrier family 25 (mitochondrial carnitine/acylcarnitine carrier), member 29                 | -2.426                | 0.024          | -1.749                     | 0.001          | -1.276                | 0.047          | 1.183                     | 0.043          | -1.067                      |
| CORO1B      | coronin, actin binding protein, 1B                                                                  | -2.326                | 0.006          | -2.044                     | 0.001          | -1.334                | 0.017          | 1.431                     | 0.002          | -1.068                      |
| CERCAM      | cerebral endothelial cell adhesion molecule                                                         | -1.948                | 0.033          | -2.017                     | <0.001         | -1.591                | 0.005          | 1.273                     | 0.001          | -1.071                      |
| PHLDB3      | pleckstrin homology-like domain, family B, member 3                                                 | -1.982                | 0.011          | -2.413                     | 0.001          | -1.339                | 0.033          | 1.365                     | 0.002          | -1.092                      |
| COPE        | coatomer protein complex subunit epsilon                                                            | -2.525                | 0.012          | -1.665                     | 0.026          | -1.425                | 0.009          | 1.236                     | 0.030          | -1.095                      |

| Gene Symbol | Gene Name                                                                       | Comparison #1         |         | Comparison #2              |         | Comparison #3         |         | Comparison #4             |         | Average of fold change (FC) |
|-------------|---------------------------------------------------------------------------------|-----------------------|---------|----------------------------|---------|-----------------------|---------|---------------------------|---------|-----------------------------|
|             |                                                                                 | pSS (n=8) vs HV (n=6) |         | pSS (n=10) vs non-SS (n=5) |         | pSS (n=3) vs HV (n=3) |         | pSS (n=3) vs IgG4RD (n=5) |         |                             |
|             |                                                                                 | FC                    | p value | FC                         | p value | FC                    | p value | FC                        | p value |                             |
| MAGIX       | MAGI family member, X-linked                                                    | -2.462                | 0.040   | -1.923                     | <0.001  | -1.408                | 0.014   | 1.407                     | 0.026   | -1.096                      |
| RASSF7      | Ras association (RalGDS/AF-6) domain family (N-terminal) member 7               | -2.598                | 0.018   | -1.644                     | 0.001   | -1.606                | 0.010   | 1.364                     | 0.001   | -1.121                      |
| ATP5D       | ATP synthase, H+ transporting, mitochondrial F1 complex, delta subunit          | -1.914                | 0.028   | -2.465                     | 0.001   | -1.316                | 0.035   | 1.187                     | 0.038   | -1.127                      |
| TEX264      | testis expressed 264                                                            | -2.018                | 0.016   | -2.162                     | 0.002   | -1.564                | 0.009   | 1.233                     | 0.022   | -1.128                      |
| ZDHHC12     | zinc finger, DHHC-type containing 12                                            | -2.322                | 0.015   | -1.859                     | 0.002   | -1.520                | 0.028   | 1.188                     | 0.038   | -1.128                      |
| SERINC2     | serine incorporator 2                                                           | -2.523                | 0.015   | -1.947                     | 0.009   | -1.389                | 0.026   | 1.310                     | 0.012   | -1.137                      |
| ACAP3       | ArfGAP with coiled-coil, ankyrin repeat and PH domains 3                        | -2.637                | 0.027   | -1.840                     | 0.003   | -1.489                | 0.013   | 1.316                     | 0.004   | -1.163                      |
| MXD4        | MAX dimerization protein 4                                                      | -2.677                | 0.009   | -1.918                     | <0.001  | -1.296                | 0.036   | 1.234                     | 0.008   | -1.164                      |
| SLC13A2     | solute carrier family 13 (sodium-dependent dicarboxylate transporter), member 2 | -2.103                | 0.010   | -2.546                     | <0.001  | -1.492                | 0.027   | 1.464                     | 0.005   | -1.169                      |
| B4GALNT3    | beta-1,4-N-acetyl-galactosaminyl transferase 3                                  | -3.066                | 0.013   | -1.414                     | 0.013   | -1.485                | 0.007   | 1.190                     | 0.013   | -1.193                      |
| BAIAP2      | BAI1-associated protein 2                                                       | -2.271                | 0.003   | -2.565                     | 0.002   | -1.338                | 0.044   | 1.391                     | 0.018   | -1.196                      |
| SOX2        | SRY box 2                                                                       | -2.228                | 0.047   | -2.467                     | <0.001  | -1.349                | 0.050   | 1.237                     | 0.011   | -1.202                      |
| S100A1      | S100 calcium binding protein A1                                                 | -3.042                | 0.035   | -1.745                     | 0.002   | -1.341                | 0.035   | 1.290                     | 0.007   | -1.209                      |
| KLHDC3      | kelch domain containing 3                                                       | -2.251                | 0.031   | -2.416                     | 0.001   | -1.434                | 0.046   | 1.242                     | 0.008   | -1.215                      |
| CERS4       | ceramide synthase 4                                                             | -2.205                | 0.009   | -2.436                     | 0.001   | -1.570                | 0.006   | 1.349                     | 0.017   | -1.215                      |
| SETD5       | SET domain containing 5                                                         | -3.217                | 0.004   | -1.416                     | 0.003   | -1.656                | 0.020   | 1.303                     | 0.039   | -1.246                      |
| AGFG2       | ArfGAP with FG repeats 2                                                        | -3.049                | 0.028   | -2.009                     | 0.001   | -1.277                | 0.042   | 1.330                     | 0.030   | -1.251                      |
| TM7SF2      | transmembrane 7 superfamily member 2                                            | -2.710                | 0.031   | -2.225                     | 0.001   | -1.607                | 0.025   | 1.464                     | 0.008   | -1.270                      |
| LRP5        | LDL receptor related protein 5                                                  | -2.714                | 0.011   | -2.279                     | 0.008   | -1.389                | 0.040   | 1.274                     | 0.027   | -1.277                      |
| ADAM15      | ADAM metallopeptidase domain 15                                                 | -3.465                | 0.002   | -1.365                     | 0.045   | -1.590                | 0.018   | 1.310                     | 0.018   | -1.278                      |
| SEZ6L2      | seizure related 6 homolog (mouse)-like 2                                        | -2.836                | 0.028   | -2.271                     | 0.001   | -1.638                | 0.013   | 1.584                     | 0.010   | -1.290                      |
| SOX4        | SRY box 4                                                                       | -2.904                | 0.009   | -1.894                     | 0.025   | -1.600                | 0.009   | 1.172                     | 0.049   | -1.306                      |
| EDA         | ectodysplasin A                                                                 | -1.543                | 0.045   | -1.340                     | 0.013   | -1.262                | 0.027   | -1.209                    | 0.036   | -1.338                      |



| Gene Symbol | Gene Name                                                                                         | Comparison #1         |                | Comparison #2              |                | Comparison #3         |                | Comparison #4             |                | Average of fold change (FC) |
|-------------|---------------------------------------------------------------------------------------------------|-----------------------|----------------|----------------------------|----------------|-----------------------|----------------|---------------------------|----------------|-----------------------------|
|             |                                                                                                   | pSS (n=8) vs HV (n=6) |                | pSS (n=10) vs non-SS (n=5) |                | pSS (n=3) vs HV (n=3) |                | pSS (n=3) vs IgG4RD (n=5) |                |                             |
|             |                                                                                                   | FC                    | <i>p</i> value | FC                         | <i>p</i> value | FC                    | <i>p</i> value | FC                        | <i>p</i> value |                             |
| DNAJC4      | DnaJ (Hsp40) homolog, subfamily C, member 4                                                       | -2.553                | 0.004          | -2.690                     | 0.002          | -1.451                | 0.011          | 1.263                     | 0.007          | -1.358                      |
| RIMS3       | regulating synaptic membrane exocytosis 3                                                         | -1.780                | 0.030          | -1.174                     | 0.033          | -1.371                | 0.012          | -1.398                    | 0.009          | -1.431                      |
| WASF2       | WAS protein family, member 2                                                                      | -3.585                | 0.010          | -2.103                     | 0.002          | 1.388                 | 0.011          | -1.578                    | 0.009          | -1.469                      |
| PITX1       | paired-like homeodomain 1                                                                         | -3.095                | 0.018          | -2.771                     | 0.001          | -1.415                | 0.012          | 1.390                     | 0.015          | -1.473                      |
| TNS1        | tensin 1                                                                                          | -1.810                | 0.038          | -1.400                     | 0.022          | -1.211                | 0.047          | -1.547                    | 0.031          | -1.492                      |
| SMARCD3     | SWI/SNF related, matrix associated, actin dependent regulator of chromatin, subfamily d, member 3 | -1.700                | 0.046          | -1.592                     | 0.008          | -1.305                | 0.045          | -1.374                    | 0.039          | -1.493                      |
| STARD10     | StAR-related lipid transfer domain containing 10                                                  | -2.343                | 0.015          | -3.579                     | 0.004          | -1.546                | 0.017          | 1.433                     | 0.004          | -1.509                      |
| NAV2        | neuron navigator 2                                                                                | -2.011                | 0.038          | -1.228                     | 0.036          | -1.274                | 0.027          | -1.545                    | 0.015          | -1.514                      |
| GATA2       | GATA binding protein 2                                                                            | -1.800                | 0.049          | -1.296                     | 0.028          | -1.631                | 0.005          | -1.453                    | 0.015          | -1.545                      |
| NADK        | NAD kinase                                                                                        | -4.451                | 0.004          | -1.727                     | 0.001          | -1.347                | 0.011          | 1.326                     | 0.041          | -1.550                      |
| SCD5        | stearoyl-CoA desaturase 5                                                                         | -1.971                | 0.025          | -1.226                     | 0.021          | -1.354                | 0.014          | -1.678                    | 0.009          | -1.557                      |
| GPSM1       | G-protein signaling modulator 1                                                                   | -1.965                | 0.027          | -1.503                     | <0.001         | -1.420                | 0.046          | -1.372                    | 0.026          | -1.565                      |
| ZC3H7B      | zinc finger CCCH-type containing 7B                                                               | -2.202                | 0.021          | -1.200                     | 0.033          | -1.266                | 0.021          | -1.653                    | 0.001          | -1.580                      |
| FOSL2       | FOS-like antigen 2                                                                                | -2.120                | 0.020          | -1.507                     | 0.010          | -1.430                | 0.020          | -1.317                    | 0.046          | -1.594                      |
| ECE1        | endothelin converting enzyme 1                                                                    | -2.575                | 0.038          | -1.274                     | 0.026          | -1.303                | 0.015          | -1.263                    | 0.010          | -1.604                      |
| BTNL9       | butyrophilin-like 9                                                                               | -1.933                | 0.031          | -1.217                     | 0.047          | -1.393                | 0.014          | -1.879                    | 0.017          | -1.606                      |
| WASH1       | WAS protein family homolog 1                                                                      | -2.236                | 0.015          | -1.371                     | 0.018          | -1.306                | 0.040          | -1.532                    | 0.007          | -1.611                      |
| JPH2        | junctophilin 2                                                                                    | -2.197                | 0.038          | -1.356                     | 0.027          | -1.494                | 0.018          | -1.476                    | 0.037          | -1.631                      |
| RECQL5      | RecQ helicase-like 5                                                                              | -2.340                | 0.012          | -1.235                     | 0.039          | -1.468                | 0.016          | -1.498                    | <0.001         | -1.635                      |
| THRA        | thyroid hormone receptor, alpha                                                                   | -2.323                | 0.021          | -1.603                     | 0.001          | -1.663                | 0.031          | -1.231                    | 0.045          | -1.705                      |
| BOC         | BOC cell adhesion associated, oncogene regulated                                                  | -2.393                | 0.047          | -1.557                     | 0.001          | -1.335                | 0.010          | -1.550                    | 0.018          | -1.709                      |
| UBQLN4      | ubiquilin 4                                                                                       | -2.568                | 0.005          | -1.390                     | 0.002          | -1.500                | 0.024          | -1.510                    | <0.001         | -1.742                      |
| ACTN1       | actinin, alpha 1                                                                                  | -2.300                | 0.018          | -2.172                     | <0.001         | -1.283                | 0.020          | -1.226                    | 0.023          | -1.745                      |
| DBP         | D site of albumin promoter (albumin D-box) binding protein                                        | -2.253                | 0.028          | -2.366                     | 0.015          | -1.400                | 0.020          | -1.218                    | 0.019          | -1.809                      |

| Gene Symbol | Gene Name                                      | Comparison #1         |                | Comparison #2              |                | Comparison #3         |                | Comparison #4             |                | Average of fold change (FC) |
|-------------|------------------------------------------------|-----------------------|----------------|----------------------------|----------------|-----------------------|----------------|---------------------------|----------------|-----------------------------|
|             |                                                | pSS (n=8) vs HV (n=6) |                | pSS (n=10) vs non-SS (n=5) |                | pSS (n=3) vs HV (n=3) |                | pSS (n=3) vs IgG4RD (n=5) |                |                             |
|             |                                                | FC                    | <i>p</i> value | FC                         | <i>p</i> value | FC                    | <i>p</i> value | FC                        | <i>p</i> value |                             |
| LZTS2       | leucine zipper, putative tumor suppressor 2    | -3.107                | 0.039          | -1.641                     | 0.034          | -1.331                | 0.031          | -1.234                    | 0.029          | -1.828                      |
| PBX2        | pre-B-cell leukemia homeobox 2                 | -3.329                | <0.001         | -1.494                     | 0.004          | -1.250                | 0.045          | -1.302                    | 0.047          | -1.844                      |
| KLK3        | kallikrein related peptidase 3                 | -3.735                | 0.001          | -1.240                     | 0.004          | -1.452                | 0.035          | -1.300                    | 0.043          | -1.932                      |
| CAPS        | calcyphosine                                   | -2.535                | 0.023          | -2.152                     | 0.011          | -1.807                | 0.001          | -1.415                    | 0.024          | -1.977                      |
| TPM2        | tropomyosin 2 (beta)                           | -3.531                | 0.024          | -1.240                     | 0.025          | -1.364                | 0.030          | -1.932                    | 0.003          | -2.017                      |
| TAGLN       | transgelin                                     | -3.307                | 0.022          | -2.195                     | 0.018          | -1.477                | 0.004          | -1.510                    | 0.044          | -2.122                      |
| KRT14       | keratin 14, type I                             | -3.467                | 0.032          | -1.494                     | 0.033          | -1.803                | 0.006          | -1.750                    | 0.041          | -2.128                      |
| METRN       | meteorin, glial cell differentiation regulator | -5.674                | 0.001          | -2.506                     | 0.001          | -1.670                | 0.003          | 1.284                     | 0.033          | -2.141                      |
| AKT2        | v-akt murine thymoma viral oncogene homolog 2  | -4.306                | 0.007          | -1.953                     | 0.004          | -1.370                | 0.017          | -1.299                    | 0.022          | -2.232                      |
| KRT17       | keratin 17, type I                             | -3.392                | 0.038          | -2.646                     | 0.026          | -1.846                | 0.004          | -1.673                    | 0.030          | -2.389                      |
| VSIG2       | V-set and immunoglobulin domain containing 2   | -3.346                | 0.001          | -2.397                     | 0.002          | -2.753                | 0.028          | -2.151                    | 0.021          | -2.662                      |

\* Fold change (FC) and *p* values were calculated by GeneSpring Multi-Omic Analysis (version 14.9-Build 11939, Agilent Technologies, Inc.), using Moderated T-Test with asymptotic *p*-value computation and Benjamini Hochberg FDR for multiple testing correlation.  
pSS: primary Sjögren syndrome; HV: healthy volunteers; IgG4RS: IgG4 related diseases

## Reference

1. Yin, H. *et al.* Association of Bone Morphogenetic Protein 6 With Exocrine Gland Dysfunction in Patients With Sjögren's Syndrome and in Mice. *Arthritis Rheum.* **65**(12): 3228–3238 (2013).
2. Greenwell-Wild, T. *et al.* Chitinases in the salivary glands and circulation of patients with Sjögren's syndrome: macrophage harbingers of disease severity. *Arthritis Rheum.* **63**(10): 3103-15 (2011).
3. Tsuboi, H. *et al.* DNA microarray analysis of labial salivary glands in IgG4-related disease: comparison with Sjögren's syndrome. *Arthritis Rheumatol.* **66**(10):2892-9 (2014).

Supplementary Table S2. Common canonical pathways in minor salivary glands among four comparisons from 3 transcriptome studies

| Canonical Pathways                                                           | Comparison #1<br>pSS (n=8) vs HV (n=6)<br>Yin, H., 2013 [1] | Comparison #2<br>pSS (n=10) vs non-SS (n=5)<br>Greenwell-Wild, T., 2011 [2] | Comparison #3<br>pSS (n=3) vs HV (n=3)<br>Tsuboi, H., 2014 [3] | Comparison #4<br>pSS (n=3) vs IgG4RD (n=5)<br>Tsuboi, H., 2014 [3] |
|------------------------------------------------------------------------------|-------------------------------------------------------------|-----------------------------------------------------------------------------|----------------------------------------------------------------|--------------------------------------------------------------------|
| Interferon Signaling                                                         | 2.138***                                                    | 2.183**                                                                     | 2.183**                                                        | 2.357***                                                           |
| PKCθ Signaling in T Lymphocytes                                              | 3.087***                                                    | 0.535**                                                                     | 4.628***                                                       | 0.164*                                                             |
| Role of Pattern Recognition Receptors in Recognition of Bacteria and Viruses | 3.266**                                                     | 0.905**                                                                     | 2.287*                                                         | 0.539**                                                            |
| RhoGDI Signaling                                                             | 2.058***                                                    | 1.941*                                                                      | 1.860***                                                       | 0.469**                                                            |
| ERK5 Signaling                                                               | 0.426***                                                    | 2.828**                                                                     | 1.761***                                                       | 0.816**                                                            |
| Activation of IRF by Cytosolic Pattern Recognition Receptors                 | 2.138*                                                      | 0.822***                                                                    | 1.512*                                                         | 1.342*                                                             |
| SPINK1 General Cancer Pathway                                                | 0.655***                                                    | 1.718***                                                                    | 2.214**                                                        | 1.095***                                                           |
| FcγRIIB Signaling in B Lymphocytes                                           | 2.000*                                                      | 1.095***                                                                    | 2.335*                                                         | 0.229**                                                            |
| B Cell Receptor Signaling                                                    | 1.820***                                                    | 0.556***                                                                    | 2.800***                                                       | 0.412***                                                           |
| Leukocyte Extravasation Signaling                                            | 2.412***                                                    | 0.611*                                                                      | 1.254**                                                        | 0.149*                                                             |
| PI3K Signaling in B Lymphocytes                                              | 1.000***                                                    | 0.739***                                                                    | 2.077***                                                       | 0.343*                                                             |
| IL-9 Signaling                                                               | 2.121*                                                      | 0.655*                                                                      | 0.218*                                                         | 0.471**                                                            |
| Th1 Pathway                                                                  | 4.017***                                                    | 1.333                                                                       | 2.111                                                          | 0.354*                                                             |
| Retinoic acid Mediated Apoptosis Signaling                                   | 2.309*                                                      | 0.600*                                                                      | 1.961*                                                         | 0.905                                                              |
| Role of BRCA1 in DNA Damage Response                                         | 1.414                                                       | 2.400***                                                                    | 1.213*                                                         | 0.378                                                              |
| Prolactin Signaling                                                          | 1.877***                                                    | 0.457***                                                                    | 1.286***                                                       | 0.928**                                                            |
| SAPK/JNK Signaling                                                           | 1.460**                                                     | 0.429***                                                                    | 1.987***                                                       | 0.632***                                                           |
| Calcium-induced T Lymphocyte Apoptosis                                       | 1.387*                                                      | 0.688                                                                       | 1.671**                                                        | 0.277                                                              |
| Tec Kinase Signaling                                                         | 1.333***                                                    | 0.405**                                                                     | 1.778***                                                       | 0.160**                                                            |
| Apelin Endothelial Signaling Pathway                                         | 1.183***                                                    | 1.033***                                                                    | 1.543***                                                       | 0.632**                                                            |
| Aldosterone Signaling in Epithelial Cells                                    | 0.853***                                                    | 0.316**                                                                     | 0.762***                                                       | 0.186***                                                           |
| UVA-Induced MAPK Signaling                                                   | 0.853***                                                    | 0.649***                                                                    | 1.372***                                                       | 0.209***                                                           |
| Gα12/13 Signaling                                                            | 0.667***                                                    | 0.130***                                                                    | 0.843***                                                       | 0.152**                                                            |
| ErbB4 Signaling                                                              | 0.655***                                                    | 0.343**                                                                     | 1.761***                                                       | 0.200***                                                           |
| Actin Nucleation by ARP-WASP Complex                                         | 0.655***                                                    | 0.200**                                                                     | 1.151***                                                       | 1.291                                                              |
| CNTF Signaling                                                               | 0.626***                                                    | 0.845***                                                                    | 1.48***                                                        | 0.655*                                                             |
| IL-3 Signaling                                                               | 0.600***                                                    | 0.905***                                                                    | 1.286***                                                       | 0.522***                                                           |
| Endothelin-1 Signaling                                                       | 0.590***                                                    | 0.333***                                                                    | 1.746**                                                        | 0.911***                                                           |

| Canonical Pathways                                       | Comparison #1<br>pSS (n=8) vs HV (n=6)<br>Yin, H., 2013 [1] | Comparison #2<br>pSS (n=10) vs non-SS (n=5)<br>Greenwell-Wild, T., 2011 [2] | Comparison #3<br>pSS (n=3) vs HV (n=3)<br>Tsuboi, H., 2014 [3] | Comparison #4<br>pSS (n=3) vs IgG4RD (n=5)<br>Tsuboi, H., 2014 [3] |
|----------------------------------------------------------|-------------------------------------------------------------|-----------------------------------------------------------------------------|----------------------------------------------------------------|--------------------------------------------------------------------|
| PDGF Signaling                                           | 0.557***                                                    | 1.021***                                                                    | 0.980***                                                       | 0.686**                                                            |
| p53 Signaling                                            | 0.447***                                                    | 0.745***                                                                    | 0.420***                                                       | 0.557***                                                           |
| Insulin Receptor Signaling                               | 0.343***                                                    | 0.662**                                                                     | 0.894***                                                       | 0.457**                                                            |
| FLT3 Signaling in Hematopoietic Progenitor Cells         | 0.186***                                                    | 0.745***                                                                    | 1.540***                                                       | 0.174***                                                           |
| Role of RIG1-like Receptors in Antiviral Innate Immunity | 1.414                                                       | 0.229**                                                                     | 0.832                                                          | 0.905                                                              |
| Small Cell Lung Cancer Signaling                         | -0.243**                                                    | -0.686***                                                                   | -0.324***                                                      | -0.655*                                                            |
| Bladder Cancer Signaling                                 | -0.577**                                                    | -1.414*                                                                     | -0.688**                                                       | -1.265                                                             |
| Apelin Adipocyte Signaling Pathway                       | -0.577                                                      | -0.816                                                                      | -1.298**                                                       | -1.147                                                             |
| Apelin Cardiomyocyte Signaling Pathway                   | -0.756***                                                   | -1.089***                                                                   | -0.980***                                                      | -1.616*                                                            |
| Basal Cell Carcinoma Signaling                           | -1                                                          | -1.460**                                                                    | -1.460*                                                        | -1.069                                                             |
| cAMP-mediated signaling                                  | -1.3                                                        | -0.459**                                                                    | -0.113*                                                        | -1.131*                                                            |
| ILK Signaling                                            | -1.769***                                                   | -0.459***                                                                   | -0.954***                                                      | -1.807***                                                          |
| Adrenomedullin signaling pathway                         | -1.570***                                                   | -0.110***                                                                   | -1.043***                                                      | -0.250***                                                          |
| Neuroprotective Role of THOP1 in Alzheimer's Disease     | -1.732                                                      | -3.674                                                                      | -2.667*                                                        | -0.229                                                             |
| GPCR-Mediated Nutrient Sensing in Enteroendocrine Cells  | -0.626*                                                     | -2.236*                                                                     | -1.093                                                         | -1.826                                                             |
| Calcium Signaling                                        | -0.894                                                      | -3.200***                                                                   | -0.832*                                                        | -1.372*                                                            |
| Amyloid Processing                                       | -1.414**                                                    | -1.897*                                                                     | -2.183***                                                      | -1.667*                                                            |

Data are ranked based on Z scores of the pathways (statistical measure of the match between expected relationship direction and observed gene expression) calculated by Ingenuity Pathway Analysis software. Red indicates positive Z scores, which predicted activation, and dark red indicated Z scores >2. Blue indicates a negative Z scores, which predicts inhibition, and dark blue indicates Z scores <-2. P values of Z scores were calculated using Fisher's exact test.

\* $p < 0.05$ ; \*\* $p < 0.01$ ; \*\*\* $p < 0.001$

pSS: primary Sjögren syndrome; HV: healthy volunteers; IgG4RS: IgG4 related diseases

## Reference

1. Yin, H. *et al.* Association of Bone Morphogenetic Protein 6 With Exocrine Gland Dysfunction in Patients With Sjögren's Syndrome and in Mice. *Arthritis Rheum.* **65**(12): 3228–3238 (2013).
2. Greenwell-Wild, T. *et al.* Chitinases in the salivary glands and circulation of patients with Sjögren's syndrome: macrophage harbingers of disease severity. *Arthritis Rheum.* **63**(10): 3103-15 (2011).
3. Tsuboi, H. *et al.* DNA microarray analysis of labial salivary glands in IgG4-related disease: comparison with Sjögren's syndrome. *Arthritis Rheumatol.* **66**(10):2892-9 (2014).

Supplementary Table S3

Comparison #1 pSS (n=8) vs HV (n=6) (Yin H, 2013 [1])

| Subject no. | Group | Gender | Age |
|-------------|-------|--------|-----|
| pSS-37      | pSS   | F      | 62  |
| pSS-94      | pSS   | F      | 60  |
| pSS-101     | pSS   | F      | 58  |
| pSS-105     | pSS   | F      | 42  |
| pSS-106     | pSS   | F      | 31  |
| pSS-139     | pSS   | F      | 46  |
| pSS-141     | pSS   | F      | 55  |
| pSS-144     | pSS   | F      | 50  |
| HV-81       | HV    | F      | 54  |
| HV-85       | HV    | F      | 37  |
| HV-86       | HV    | F      | 53  |
| HV-88       | HV    | F      | 34  |
| HV-102      | HV    | F      | 44  |
| HV-122      | HV    | F      | 30  |

Comparison #2: pSS (n=10) vs non-SS (n=5) (Greenwell-Wild T, 2011 [2])

| Subject no. | Group                                                      | Gender | Age |
|-------------|------------------------------------------------------------|--------|-----|
| C1          | Non-SS (PBC; allergies)                                    | F      | 53  |
| C2          | Non-SS (Psoriatic arthritis)                               | F      | 51  |
| C3          | Non-SS (arthralgia, myalgia, muscle weakness, scleroderma) | F      | 54  |
| C4          | Non-SS (dry tongue, tuberculosis)                          | F      | 43  |
| C5          | Non-SS (SLE)                                               | F      | 30  |
| E1          | pSS                                                        | F      | 60  |
| E2          | pSS                                                        | F      | 41  |
| E3          | pSS                                                        | F      | 47  |
| E4          | pSS                                                        | F      | 27  |
| E5          | pSS                                                        | F      | 50  |
| I1          | pSS                                                        | F      | 54  |
| I2          | pSS                                                        | F      | 51  |
| I3          | pSS                                                        | F      | 63  |
| S1          | pSS                                                        | F      | 54  |
| S2          | pSS                                                        | F      | 32  |

Comparison #3 & #4 (Tsuboi H, 2014 [3])

| Subject no.* | Group  | Gender | Age |
|--------------|--------|--------|-----|
| SS1          | pSS    | F      | 22  |
| SS2          | pSS    | F      | 37  |
| SS5          | pSS    | F      | 36  |
| HV1          | HV     | F      | 65  |
| HV2          | HV     | F      | 38  |
| HV3          | HV     | F      | 23  |
| IgG4RD1      | IgG4RD | F      | 57  |
| IgG4RD2      | IgG4RD | F      | 61  |
| IgG4RD3      | IgG4RD | F      | 56  |
| IgG4RD4      | IgG4RD | F      | 58  |
| IgG4RD5      | IgG4RD | F      | 61  |

Reference

1. Yin, H. *et al.* Association of Bone Morphogenetic Protein 6 With Exocrine Gland Dysfunction in Patients With Sjögren's Syndrome and in Mice. *Arthritis Rheum.* **65**(12): 3228–3238 (2013).
2. Greenwell-Wild, T. *et al.* Chitinases in the salivary glands and circulation of patients with Sjögren's syndrome: macrophage harbingers of disease severity. *Arthritis Rheum.* **63**(10): 3103-15 (2011).
3. Tsuboi, H. *et al.* DNA microarray analysis of labial salivary glands in IgG4-related disease: comparison with Sjögren's syndrome. *Arthritis Rheumatol.* **66**(10):2892-9 (2014).



Supplementary Table S4. Clinical feature of pSS patients and HV used to establish primary cells

| <b>pSGECs</b> | <b>Sex</b> | <b>SSA</b> | <b>SSB</b> | <b>FS</b> | <b>WUS &lt;1.5 mL/15 min</b> |
|---------------|------------|------------|------------|-----------|------------------------------|
| HV_#3254      | F          | No         | No         | 0         | No                           |
| HV_#3267      | F          | No         | No         | 0         | No                           |
| HV_#3274      | M          | No         | No         | 0         | No                           |
| HV_#3214      | F          | No         | No         | 2         | No                           |
| HV_#3204      | F          | No         | No         | 0         | Yes                          |
|               |            |            |            |           |                              |
| pSS_#2935     | F          | No         | Yes        | 1         | Yes                          |
| pSS_#3098     | F          | Yes        | No         | 2         | Yes                          |
| pSS_#3013     | F          | Yes        | Yes        | 2         | Yes                          |
| pSS_#3237     | F          | Yes        | No         | 1         | Yes                          |
| pSS_#3247     | F          | Yes        | No         | 1         | No                           |
| pSS_#3371     | M          | Yes        | Yes        | 1         | No                           |
| pSS_#3485     | M          | Yes        | Yes        | 3         | Yes                          |
| pSS_#3203     | F          | No         | No         | 1         | Yes                          |

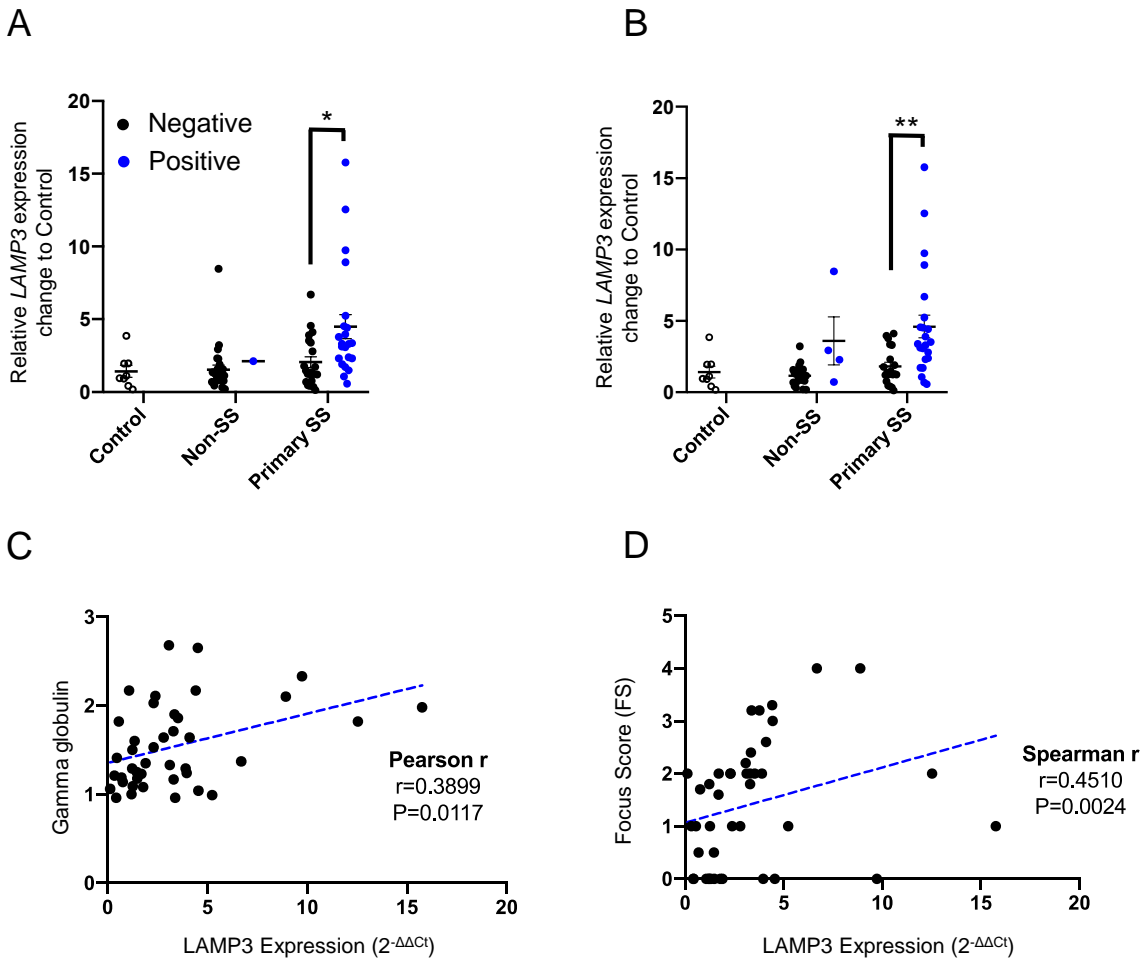

### Supplementary Figure S1.

**LAMP3 correlates with autoantibodies and gamma globulin levels in pSS patients.** (A, B) Patients were divided based on clinical presentation of autoantibodies (A. anti La/SSB, B. ANA) and then data plotted vs LAMP3 mRNA expression observed in non-SS and pSS. (C) Patients serum level of gamma globulin as measured by Serum Protein Electrophoresis (SPE) was compared with LAMP3 mRNA expression levels. The present of gamma globulin within the range (0.6-1.79g/dL) was defined as normal. (D) Patients focus score was calculated following ACR 2016 criteria (foci/4 mm<sup>2</sup>) and compared with LAMP3 mRNA expression. \* $p<0.05$ , \*\* $p<0.01$ , unpaired Student's  $t$ -test.

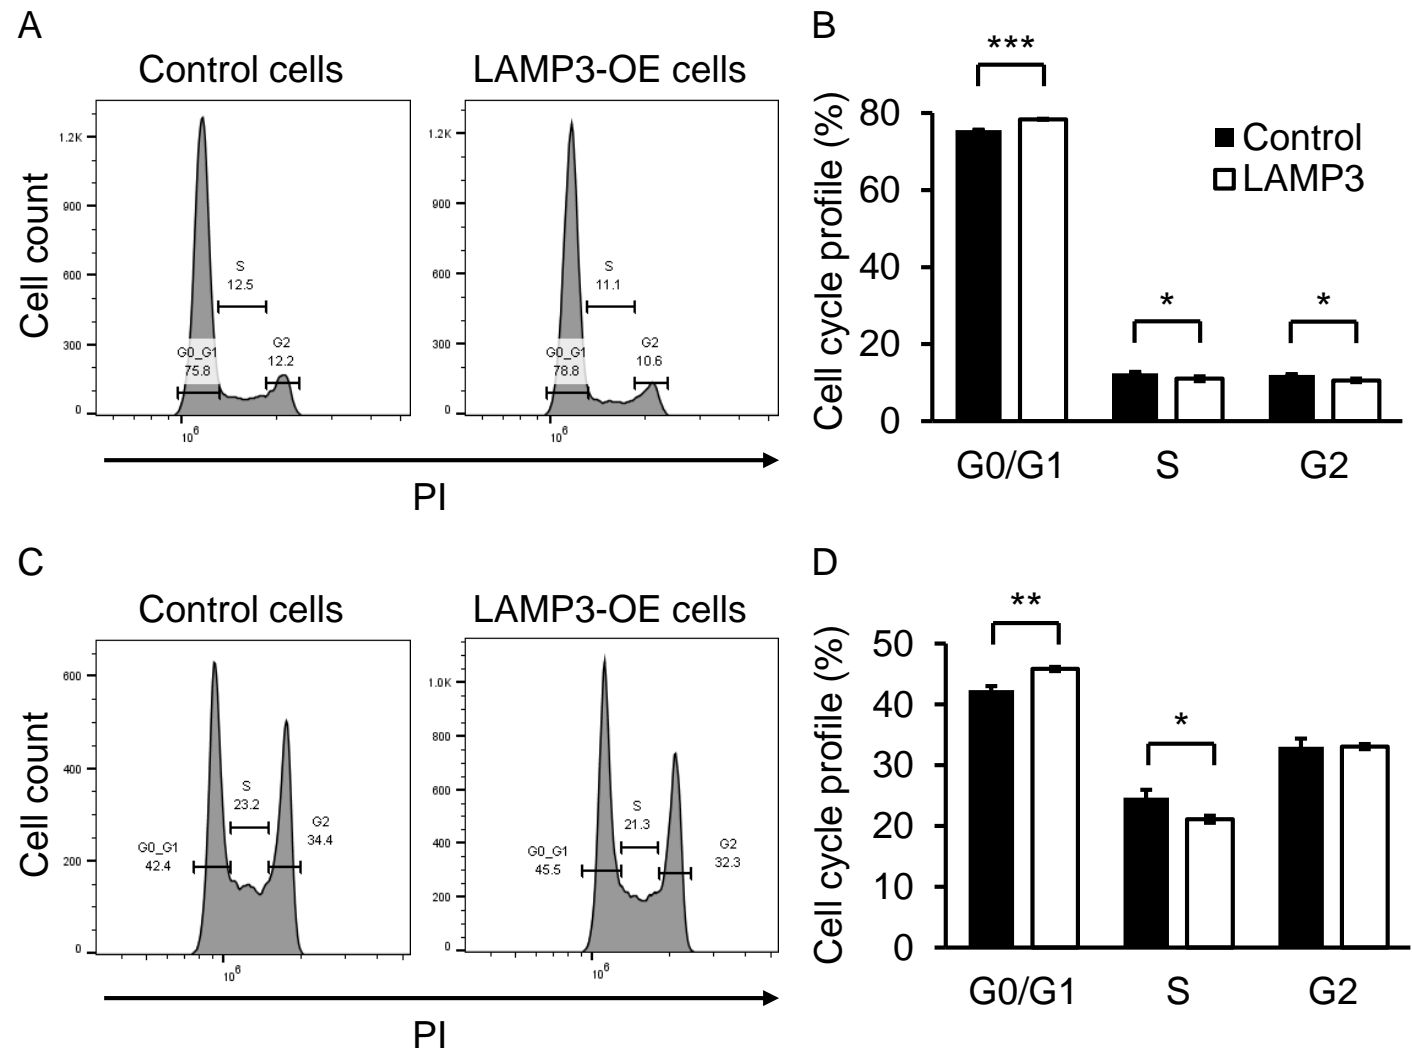

### Supplementary Figure S2.

**LAMP3 induced G0/G1 arrest.** Cell cycle analysis was performed in controls and LAMP3-OE cells of (A, B) HSG and (C, D) A253 cells. \*  $p < 0.05$ , \*\*  $p < 0.01$ , \*\*\*  $p < 0.001$ , unpaired Student's *t*-test.

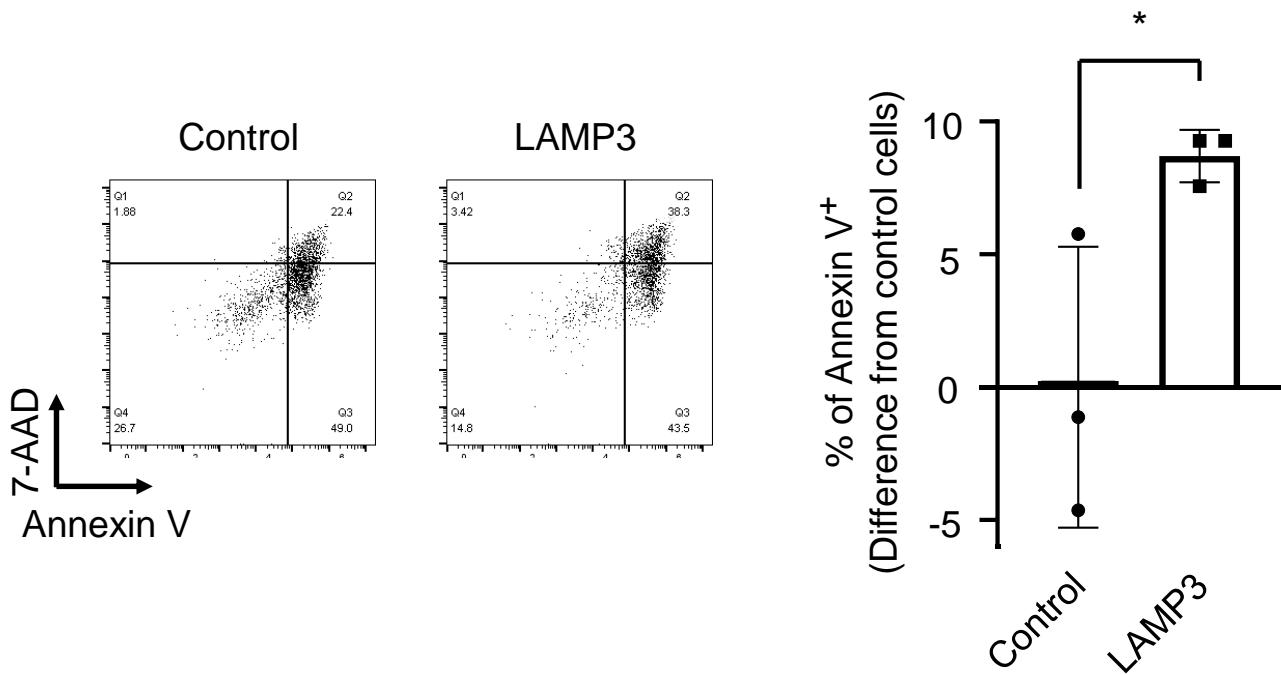

### Supplementary Figure S3.

**LAMP3 expression in NS-SV-AC cells induced apoptosis.** NS-SV-AC cells were transfected with pME18S-LAMP3 plasmid or a pME18S-empty plasmid as control. Forty-eight hours post-transfection, apoptotic cells were counted by using flow cytometry with APC Annexin V/7-AAD. Difference from control cells is shown (N = 3). \*  $p < 0.05$ , unpaired Student's  $t$ -test.

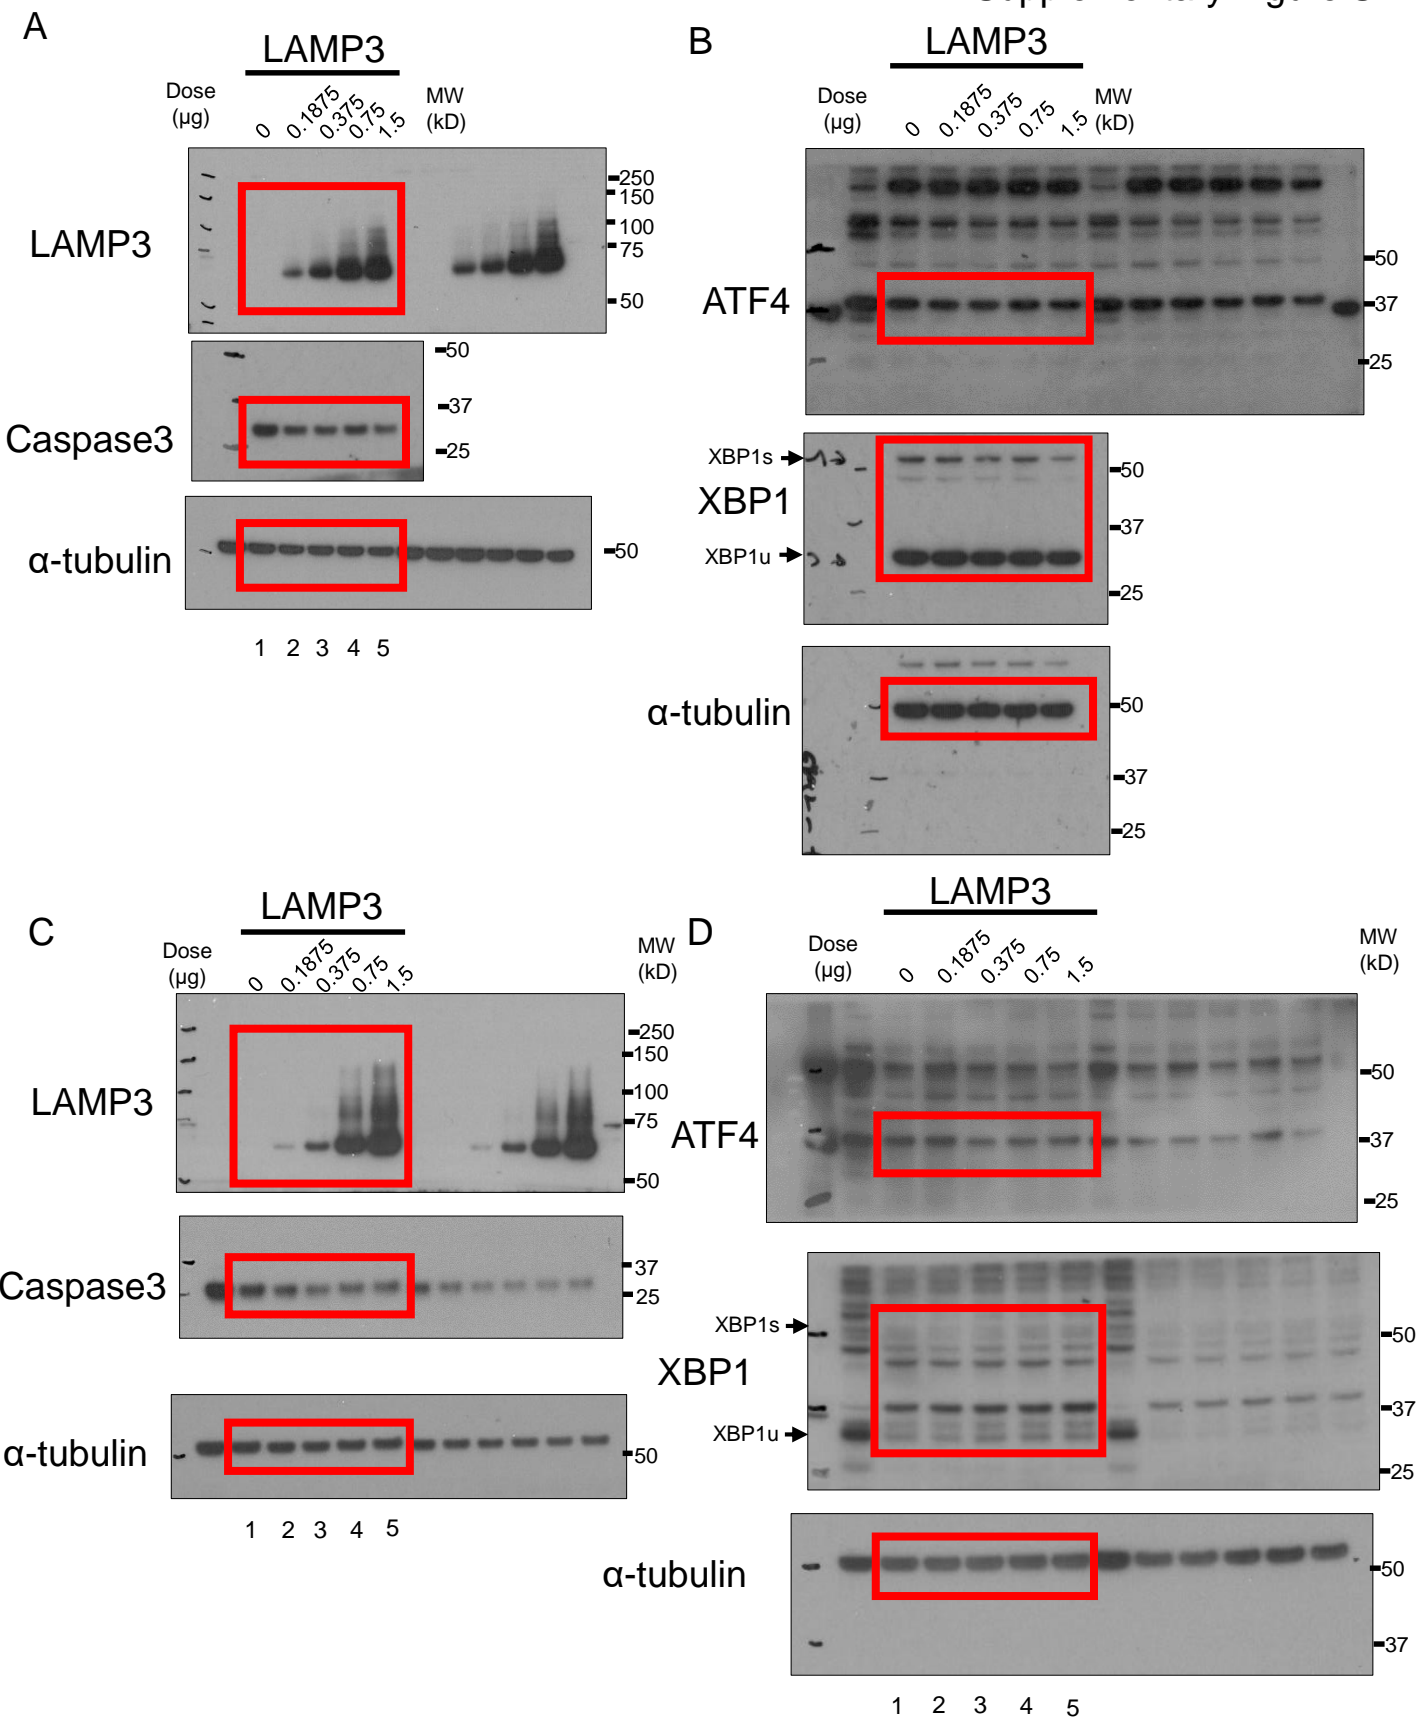

(continue to next page)

**Supplementary Figure S4.** Full, uncropped images of western blot membrane with molecular weight (MW) ladder from Figure 4 in which each result is boxed in red. **(A)** Full, uncropped images of western blot membrane from Figure 4B. **(B)** Full, uncropped images of western blot membrane from Figure 4C. **(C)** Full, uncropped images of western blot membrane from Figure 4E. **(D)** Full, uncropped images of western blot membrane from Figure 4F.

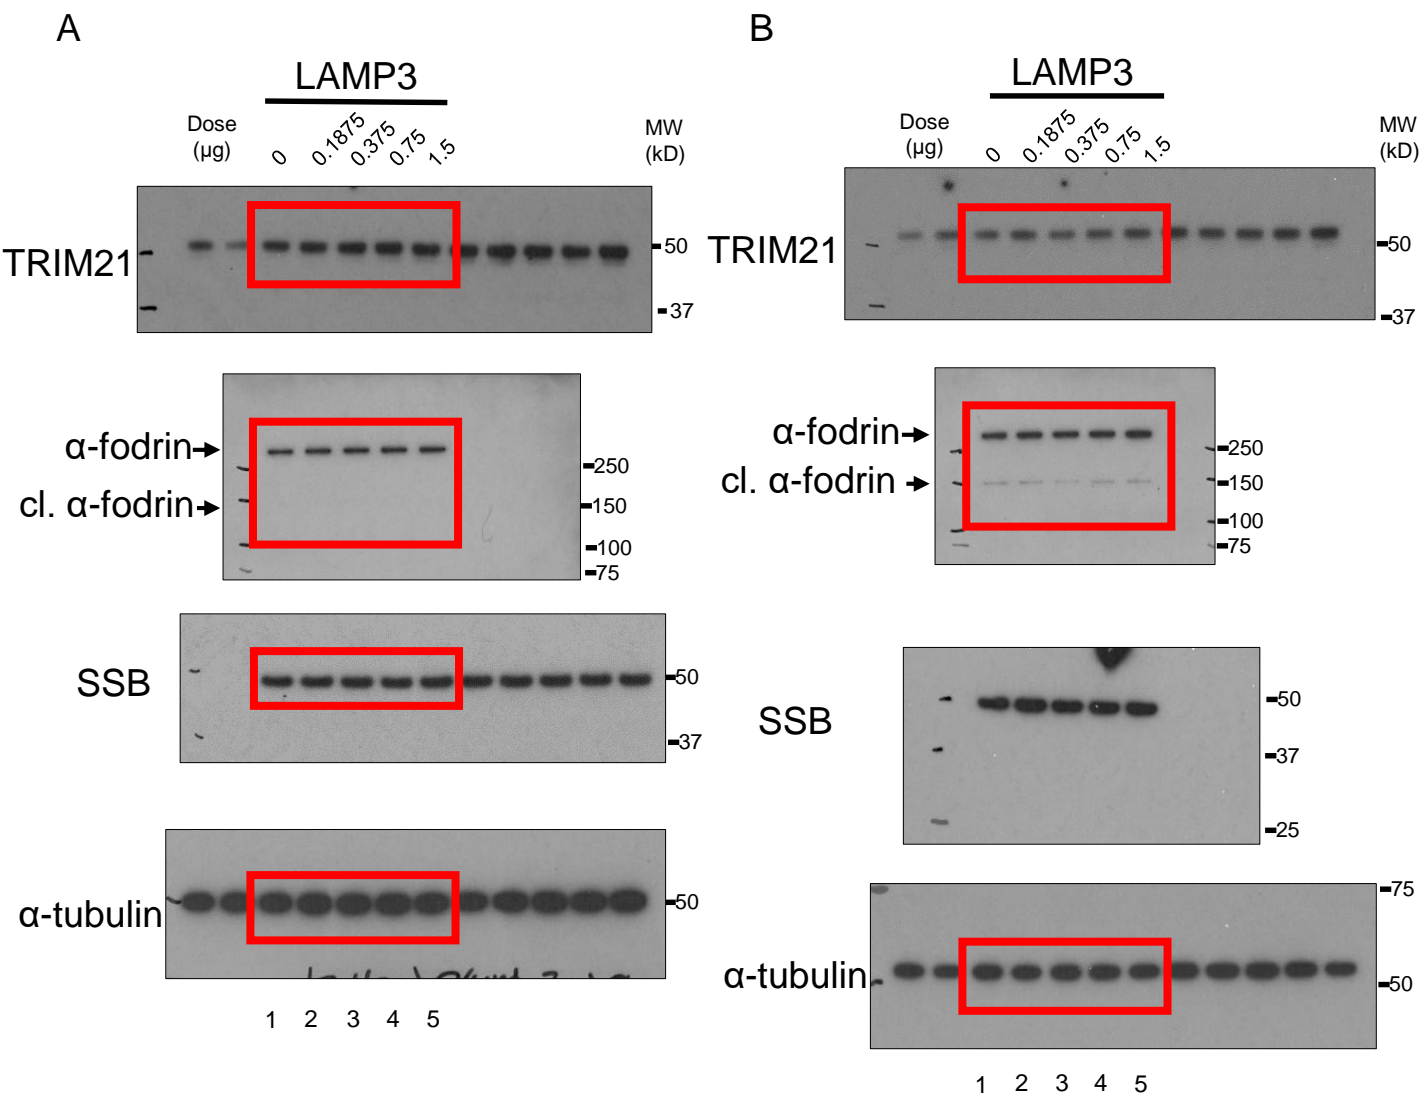

(continue to next page)

C

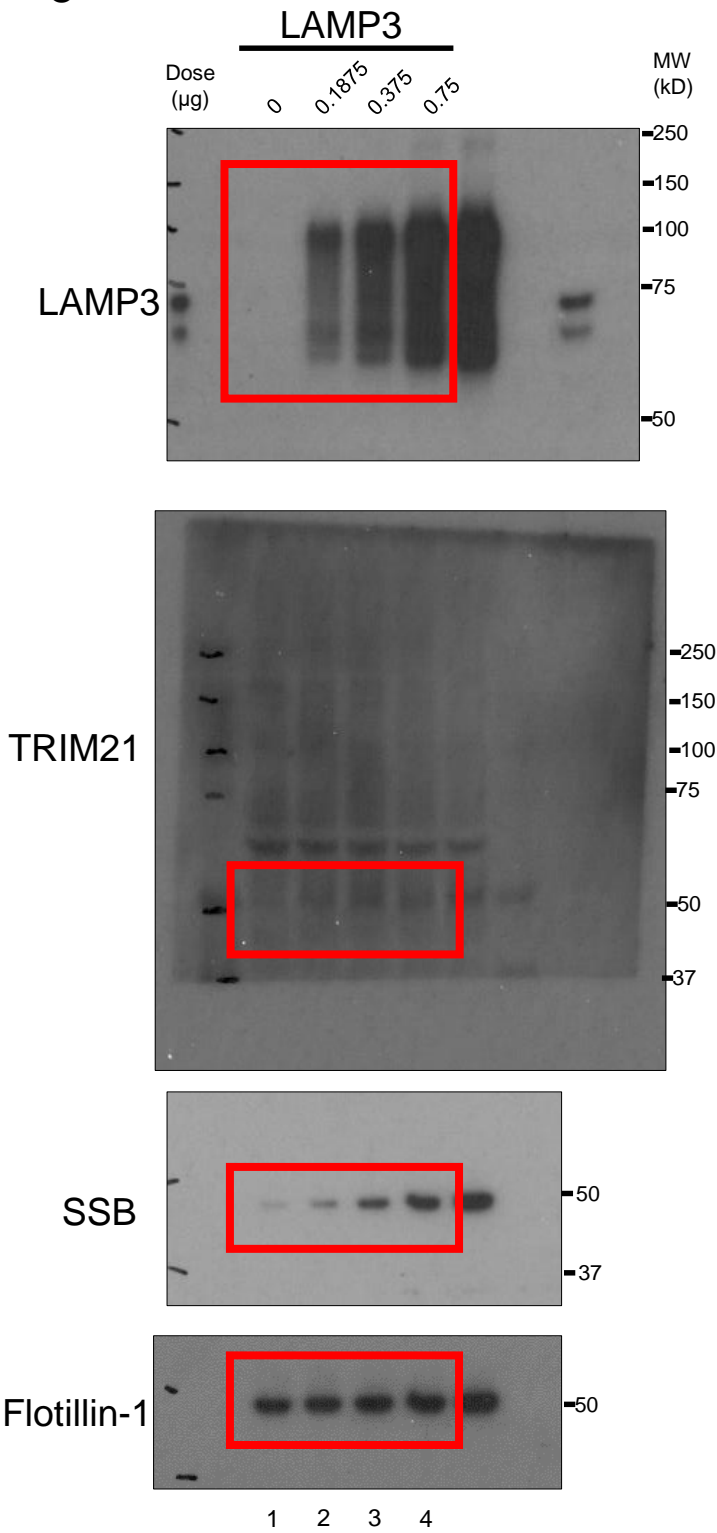

D

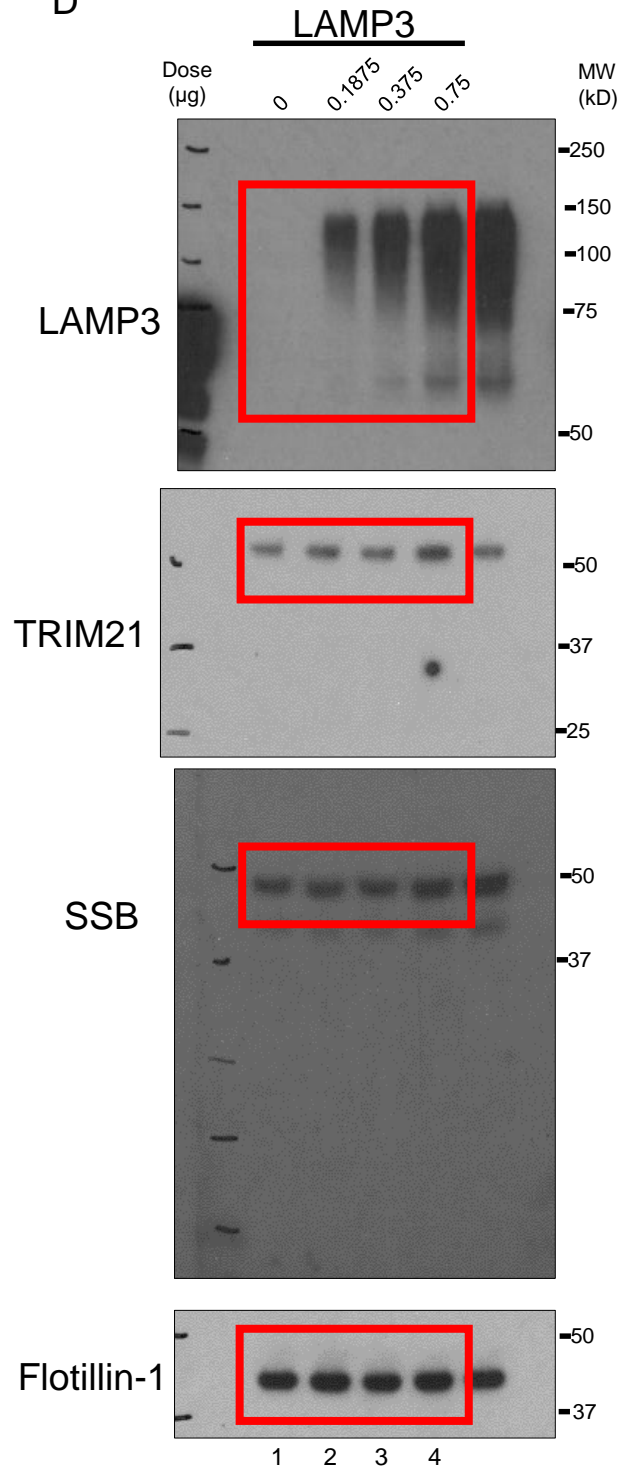

(continue to next page)



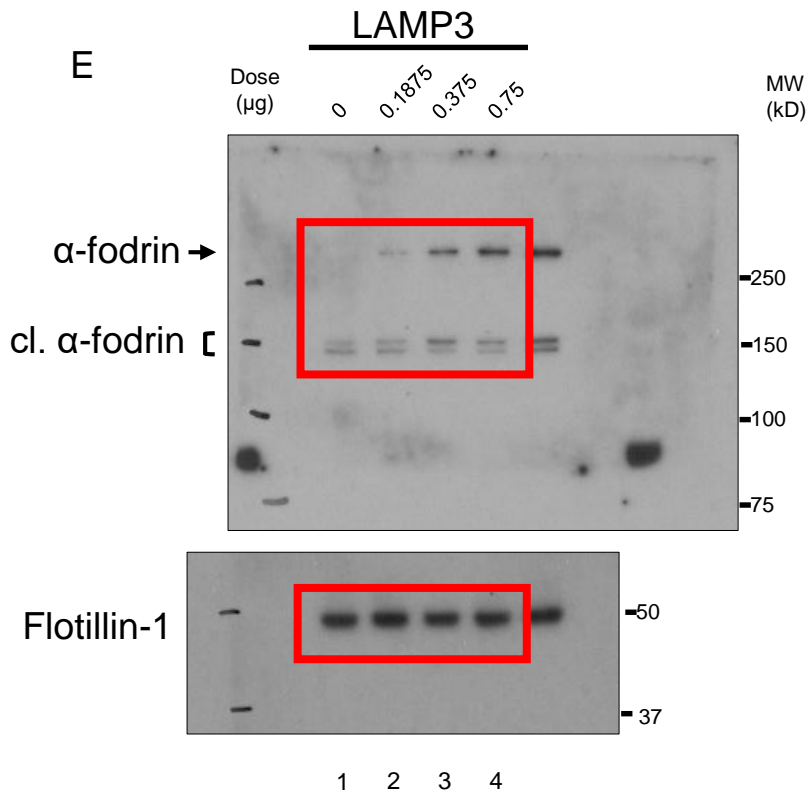

**Supplementary Figure S5.** Full, uncropped images of western blot membrane with molecular weight (MW) ladder from Figure 5 in which each result is boxed in red. **(A)** Full, uncropped images of western blot membrane from Figure 5B. **(B)** Full, uncropped images of western blot membrane from Figure 5C. **(C)** Full, uncropped images of western blot membrane from Figure 5E. **(D)** Full, uncropped images of western blot membrane from Figure 5F. **(E)** Full, uncropped images of western blot membrane from Figure 5G.

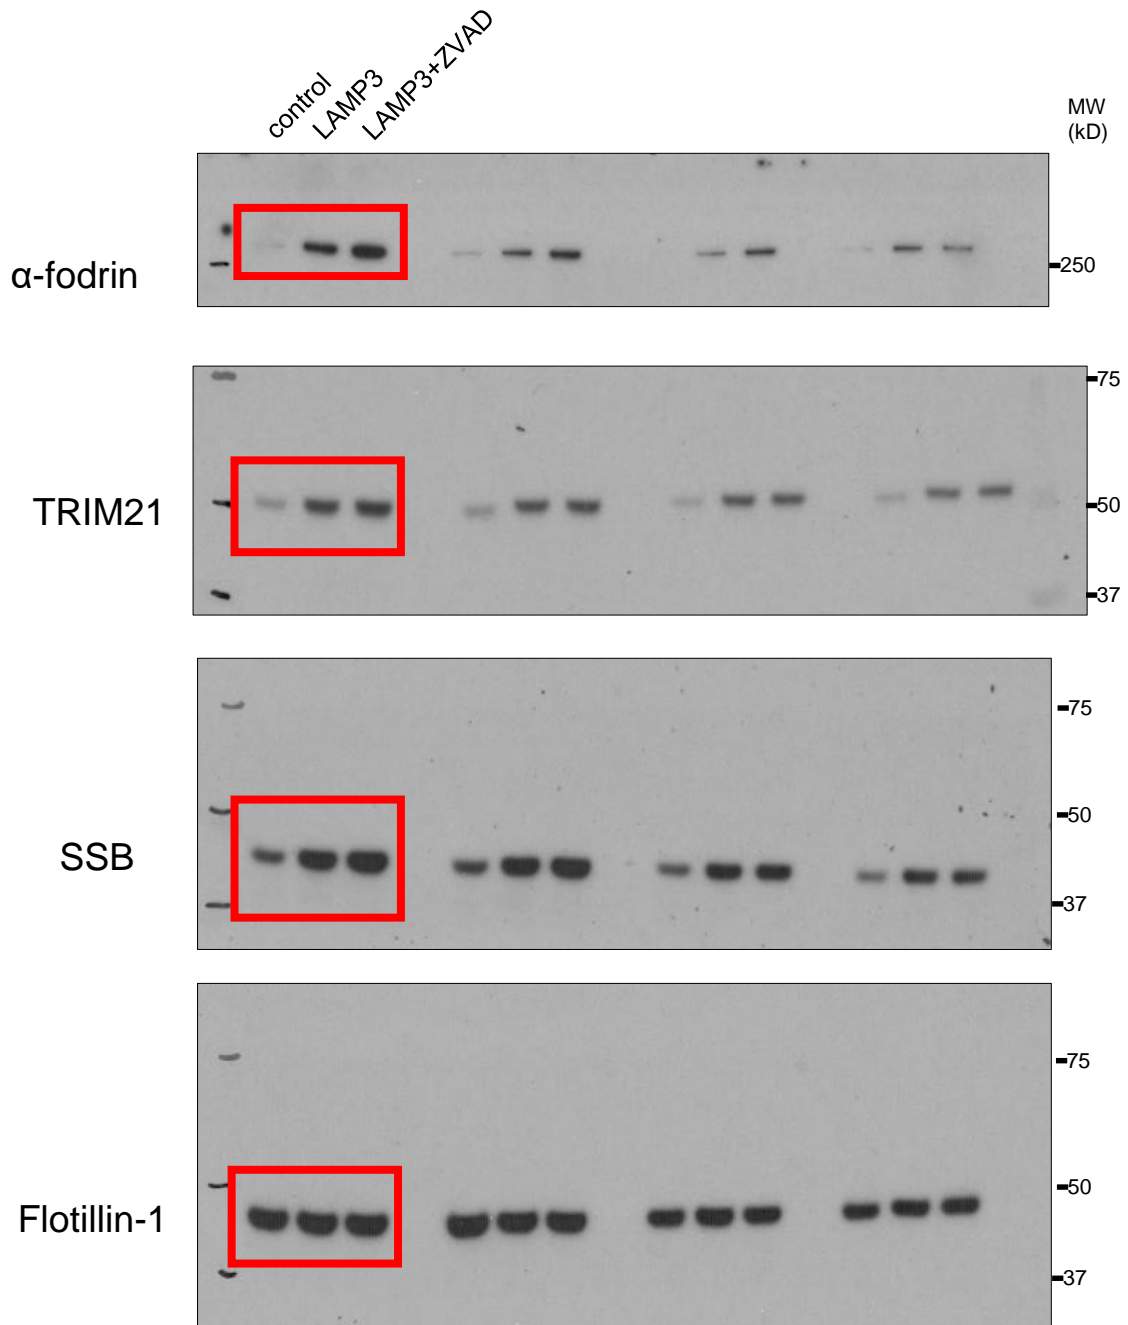

**Supplementary Figure S6.** Full, uncropped images of western blot membrane with molecular weight (MW) ladder from Figure 6B in which each result is boxed in red.
